# Supplementary material for: Bigger Data Approach to Analysis of Essential Oils and Their Antifungal Activity against Aspergillus niger, Candida albicans, and Cryptococcus neoformans
Source: PubMed Central journal article supplement (PMC6718987; doi:10.3390/molecules24162868), 2019-08-07
Supplement: molecules-24-02868-s001.pdf [file molecules-24-02868-s001.pdf]

**Supplementary Figure 1.** Tables of GC-MS data for each of the 82 essential oils reported herein.

## 1.) Ambrette Seed

| RT      | Area% | Component                              | RI   |
|---------|-------|----------------------------------------|------|
| 37.263  | 0.12  | Carvacrol                              | 1296 |
| 44.644  | 1.56  | Decyl acetate                          | 1408 |
| 47.389  | 0.05  | Farnesene <E,beta>                     | 1452 |
| 55.59   | 0.23  | Hexadecene                             | 1587 |
| 56.785  | 2.07  | Dodecyl acetate                        | 1607 |
| 61.487  | 0.05  | Farnesal <2Z,6Z>                       | 1690 |
| 62.425  | 0.05  | Farnesal <2E,6Z>                       | 1707 |
| 62.758  | 0.66  | Farnesol <2E,6Z>                       | 1713 |
| 63.353  | 0.46  | Oxacyclopentadec-6-en-2-one <Z>        | 1725 |
| 63.918  | 0.1   | Farnesal <2E,6E>                       | 1735 |
| 66.004  | 0.14  | 9,12-Tetradecadien-1-ol, acetate <Z,Z> | 1774 |
| 66.504  | 0.76  | cis-7-Tetradecen-1-yl acetate          | 1783 |
| 67.743  | 4.33  | Farnesyl acetate <Z,E>                 | 1806 |
| 69.106  | 59.65 | Farnesyl acetate <E,E>                 | 1833 |
| 73.524  | 0.73  | Farnesyl acetone <5E,9E>               | 1920 |
| 73.738  | 0.12  | Palmitate <methyl>                     | 1924 |
| 74.229  | 8.89  | Oxacycloheptadec-7-en-2-one            | 1934 |
| 74.397  | 0.11  | Beyerene                               | 1938 |
| 75.431  | 3.87  | Palmitic acid                          | 1959 |
| 77.7    | 0.34  | Geranyl linalool <Z,E>                 | 2006 |
| 79.663  | 0.12  | Geranyl linalool <E,E>                 | 2048 |
| 81.654  | 0.1   | Methyl linoleate                       | 2090 |
| 81.998  | 0.06  | Methyl octadecanoate <9E>              | 2098 |
| 83.39   | 5.65  | Linoleic acid <Z>                      | 2128 |
| 83.701  | 8.56  | Oleic Acid                             | 2135 |
| 84.736  | 0.64  | Octadecanoic acid                      | 2158 |
| 85.016  | 0.11  | Ethyl oleate                           | 2165 |
| 86.56   | 0.06  | Docosane                               | 2199 |
| 103.091 | 0.09  | Docosyl acetate                        | 2608 |

## 2.) Yarrow

| RT     | Area % | Component                   | RI   |
|--------|--------|-----------------------------|------|
| 12.547 | 0.29   | Thujene <alpha>             | 925  |
| 12.973 | 1.72   | Pinene <alpha>              | 932  |
| 15.219 | 17.18  | Sabinene                    | 972  |
| 15.534 | 11     | Pinene <beta>               | 977  |
| 16.145 | 0.5    | Myrcene                     | 988  |
| 17.918 | 0.35   | Terpinene <alpha>           | 1017 |
| 18.407 | 0.28   | Cymene <para>               | 1024 |
| 18.715 | 0.52   | Limonene                    | 1029 |
| 18.933 | 3.42   | 1,8-cineole                 | 1032 |
| 19.81  | 0.39   | Ocimene <E,beta>            | 1045 |
| 20.574 | 6.18   | Artemisia ketone            | 1056 |
| 23.43  | 2.63   | Linalool                    | 1099 |
| 26.763 | 0.33   | Camphor                     | 1147 |
| 27.87  | 0.37   | Artemisyl acetate           | 1163 |
| 29.088 | 3.49   | Terpinen-4-ol               | 1180 |
| 30.088 | 0.68   | Terpineol <alpha>           | 1195 |
| 33.824 | 2.04   | Linalyl acetate             | 1249 |
| 35.188 | 0.97   | 4-Thujen-2-alpha-yl acetate | 1269 |
| 35.677 | 0.31   | Ethyl chrysenthmumate       | 1276 |
| 36.134 | 1.12   | Lavandulyl acetate          | 1282 |
| 36.224 | 0.51   | Bornyl acetate              | 1284 |
| 42.835 | 0.56   | Bourbonene <beta>           | 1383 |
| 45.155 | 15     | Caryophyllene <E>           | 1419 |
| 47.205 | 0.89   | Farnesene <E,beta>          | 1452 |
| 47.396 | 1.79   | Humulene <alpha>            | 1455 |
| 49.01  | 19.06  | Germacrene D                | 1481 |
| 49.855 | 1.42   | Farnesene <Z,E,alpha>       | 1494 |
| 51.244 | 0.42   | Cadinene <delta>            | 1517 |
| 55.06  | 1.93   | Caryophyllene oxide         | 1581 |
| 63.319 | 4.65   | Chamazulene                 | 1727 |

### 3.) Fragonia

| RT     | Area % | Component             | RI   |
|--------|--------|-----------------------|------|
| 10.402 | 0.25   | Thujene <alpha>       | 925  |
| 10.801 | 22.7   | Pinene <alpha>        | 932  |
| 12.826 | 0.35   | Sabinene              | 971  |
| 13.102 | 1.72   | Pinene <beta>         | 976  |
| 13.74  | 1.05   | Myrcene               | 989  |
| 15.37  | 0.12   | Terpinene <alpha>     | 1016 |
| 15.846 | 5.15   | Cymene <para>         | 1024 |
| 16.133 | 2.68   | Limonene              | 1029 |
| 16.35  | 37.2   | 1,8-cineole           | 1032 |
| 17.939 | 0.6    | Terpinene <gamma>     | 1057 |
| 20.693 | 7.77   | Linalool              | 1100 |
| 23.355 | 0.3    | Pinocarveol <trans>   | 1139 |
| 25.395 | 0.33   | Terpineol <delta>     | 1169 |
| 26.094 | 3.62   | Terpinen-4-ol         | 1179 |
| 27.143 | 10.73  | Terpineol <alpha>     | 1195 |
| 29.085 | 0.33   | Nerol                 | 1223 |
| 29.276 | 0.5    | Citronellol           | 1226 |
| 30.859 | 0.88   | Geraniol              | 1250 |
| 31.665 | 0.35   | Myrtanol <trans>      | 1261 |
| 35.675 | 0.86   | Myrtenyl acetate <Z>  | 1321 |
| 41.829 | 0.32   | Caryophyllene <trans> | 1416 |
| 43.003 | 0.21   | Aromadendrene         | 1435 |
| 44.076 | 0.5    | Humulene <alpha>      | 1452 |
| 46.284 | 0.17   | Viridiflorene         | 1487 |
| 48.159 | 0.13   | Calamenene <trans>    | 1518 |
| 51.384 | 0.37   | Spathulenol           | 1572 |
| 51.91  | 0.19   | Globulol              | 1581 |
| 52.414 | 0.15   | Viridifloral          | 1590 |
| 54.623 | 0.2    | Acorenol              | 1628 |
| 55.88  | 0.27   | Eudesmol <alpha>      | 1651 |

#### 4.) Ajowan

| RT     | Area % | Component                         | RI   |
|--------|--------|-----------------------------------|------|
| 11.314 | 0.07   | Thujene <alpha>                   | 923  |
| 11.703 | 0.71   | Pinene <alpha>                    | 931  |
| 14.101 | 2      | Pinene <beta>                     | 977  |
| 14.732 | 0.59   | Myrcene                           | 988  |
| 15.761 | 0.1    | Phellandrene <alpha>              | 1004 |
| 15.891 | 0.04   | Carene <delta-3>                  | 1006 |
| 16.403 | 0.42   | Terpinene <alpha>                 | 1014 |
| 16.9   | 16.32  | Cymene <para>                     | 1022 |
| 17.165 | 0.42   | Limonene                          | 1026 |
| 17.268 | 0.38   | Phellandrene <beta>               | 1028 |
| 19.065 | 45.08  | Terpinene <gamma>                 | 1056 |
| 19.8   | 0.04   | Sabinene hydrate <cis>            | 1067 |
| 20.772 | 0.08   | Terpinolene                       | 1083 |
| 21.108 | 0.11   | Cymenene <para>                   | 1088 |
| 22.699 | 0.09   | 2,4-dimethyl-heptadienal          | 1111 |
| 24.477 | 0.06   | Menthatriene <1,3,8-para>         | 1137 |
| 25.144 | 0.06   | Verbenol                          | 1147 |
| 26.069 | 0.04   | Mentha-2,8-dien-1-ol <trans-para> | 1160 |
| 26.315 | 0.14   | Menthol                           | 1164 |
| 27.112 | 0.1    | 1,8-menthadien-4-ol <para>        | 1176 |
| 27.243 | 0.23   | Terpinen-4-ol                     | 1178 |
| 27.705 | 0.13   | Cymen-8-ol <para>                 | 1184 |
| 28.265 | 0.12   | Terpineol <alpha>                 | 1193 |
| 28.464 | 0.07   | Carvone <dihydro-trans>           | 1196 |
| 31.601 | 0.09   | Carvone                           | 1242 |
| 34.122 | 0.22   | Isothymol                         | 1279 |
| 34.786 | 31.68  | Thymol                            | 1289 |
| 35.246 | 0.43   | Carvacrol                         | 1296 |
| 37.263 | 0.06   | Mentha-1,4,-dien-7-ol <para>      | 1327 |
| 55.046 | 0.12   | Dill apiole                       | 1618 |

## 5.) Getto

| RT     | Area% | Component                 | RI   |
|--------|-------|---------------------------|------|
| 12.641 | 4.91  | Thujene <alpha>           | 925  |
| 13.068 | 2.33  | Pinene <alpha>            | 932  |
| 14.009 | 0.23  | Camphene                  | 949  |
| 15.319 | 13.71 | Sabinene                  | 972  |
| 15.634 | 5.62  | Pinene <beta>             | 977  |
| 16.252 | 1.1   | Myrcene                   | 988  |
| 17.356 | 0.3   | Phellandrene <alpha>      | 1006 |
| 18.033 | 2.75  | Terpinene <alpha>         | 1016 |
| 18.538 | 13.17 | Cymene <para>             | 1024 |
| 18.837 | 2.45  | Limonene                  | 1028 |
| 18.95  | 0.62  | Phellandrene <beta>       | 1030 |
| 19.07  | 17.27 | 1,8-cineole               | 1032 |
| 20.763 | 14.88 | Terpinene <gamma>         | 1057 |
| 21.561 | 0.17  | 4-Thujanol <cis>          | 1069 |
| 22.583 | 1.72  | Terpinolene               | 1084 |
| 23.544 | 0.62  | Linalool                  | 1099 |
| 23.665 | 0.16  | Sabinene hydrate <trans>  | 1101 |
| 25.289 | 0.34  | Menth-2-en-1-ol <cis,p>   | 1124 |
| 26.536 | 0.29  | Menth-2-en-1-ol <trans,p> | 1142 |
| 29.235 | 12.45 | Terpinen-4-ol             | 1180 |
| 30.21  | 0.61  | Terpineol <alpha>         | 1194 |
| 31.163 | 0.12  | Piperitol <trans>         | 1208 |
| 35.635 | 0.29  | Ascaridol glycol <E>      | 1273 |
| 45.269 | 1.3   | Caryophyllene <trans>     | 1419 |
| 51.077 | 0.16  | Amorphene <delta>         | 1512 |
| 53.92  | 0.2   | Nerolidol <trans>         | 1560 |
| 55.201 | 1.48  | Caryophyllene oxide       | 1581 |

## 6.) Amyris

| RT     | Area% | Component                                | RI   |
|--------|-------|------------------------------------------|------|
| 46.991 | 0.29  | Amorpha-4,11-diene                       | 1448 |
| 47.493 | 0.98  | Himachalene <alpha>                      | 1456 |
| 48.754 | 0.8   | Curcumene <gamma>                        | 1477 |
| 48.954 | 1.45  | Curcumene                                | 1480 |
| 49.688 | 0.3   | Selinene <beta>                          | 1491 |
| 49.821 | 2.26  | Zingiberene <alpha>                      | 1494 |
| 50.5   | 1.03  | Dihydroagarofuran <beta>                 | 1505 |
| 50.615 | 0.86  | Bisabolene <beta>                        | 1506 |
| 51.317 | 0.28  | Selinene <7-epi,alpha>                   | 1518 |
| 51.58  | 3.82  | Sesquiphellandrene <beta>                | 1523 |
| 52.651 | 0.71  | Selina-3,7(11)-diene                     | 1541 |
| 53.04  | 11.55 | Elemol <alpha>                           | 1547 |
| 53.775 | 0.49  | Nerolidol <E>                            | 1560 |
| 56.489 | 1.65  | Eudesmol <5-epi,7-epi,alpha>             | 1605 |
| 56.913 | 0.16  | Zingiberenol                             | 1613 |
| 57.412 | 8     | Eudesmol <10-epi,gamma>                  | 1622 |
| 57.54  | 1.54  | Eremoligenol                             | 1624 |
| 57.936 | 7.01  | Eudesmol <gamma>                         | 1631 |
| 58.399 | 0.19  | Hinesol                                  | 1639 |
| 58.66  | 0.57  | Agarospirol II                           | 1644 |
| 58.761 | 0.59  | Sesquiterpene                            | 1645 |
| 59.214 | 39.05 | Eudesmol <alpha>                         | 1653 |
| 59.614 | 12.2  | Eudesmol <7-epi,alpha>                   | 1661 |
| 60.616 | 1.06  | Germacra-4(15),5,10(14)-trien-1-alpha-ol | 1678 |
| 61.584 | 0.56  | Farnesol <2Z,6Z>                         | 1695 |
| 64.042 | 0.56  | Bisabolone <6S,7R>                       | 1741 |
| 64.581 | 0.28  | Bisabolone                               | 1751 |
| 65.497 | 1.76  | Drimenol                                 | 1768 |

## 7.) Agarwood

| RT     | Area% | Component                     | RI   |
|--------|-------|-------------------------------|------|
| 14.538 | 0.63  | Benzaldehyde                  | 960  |
| 33.248 | 5.07  | Benzylacetone                 | 1240 |
| 50.244 | 0.98  | Bulnesene <alpha>             | 1500 |
| 53.925 | 2.51  | Calcorene <alpha>             | 1562 |
| 54.752 | 1.2   | Caryophyllene oxide           | 1576 |
| 55.56  | 1.96  | Sesquithuriferol              | 1589 |
| 56.714 | 0.75  | Atlantol <beta>               | 1609 |
| 57.39  | 3.35  | Eremoligenol                  | 1621 |
| 57.92  | 3.33  | Eudesmol <gamma>              | 1631 |
| 58.164 | 3.34  | Hinesol                       | 1635 |
| 58.37  | 4.61  | Agarospinol                   | 1639 |
| 58.464 | 6.25  | Alloaromadendrene epoxide     | 1640 |
| 59.157 | 6.48  | Valerianol                    | 1652 |
| 59.234 | 9.58  | alpha-Eudesmol                | 1654 |
| 59.387 | 2.82  | Cadinol <alpha>               | 1656 |
| 59.785 | 2.01  | Bulnesol                      | 1664 |
| 60.262 | 8.36  | Guaia-3,9-dien-11-ol <trans>  | 1672 |
| 61.395 | 0.89  | Norketoagarofuran             | 1692 |
| 61.603 | 5.92  | 10-alpha-Eremophilane         | 1696 |
| 62.01  | 1.61  | Mayurone                      | 1703 |
| 63.594 | 2.09  | Eremophilone                  | 1732 |
| 64.316 | 2.12  | Zerumbone                     | 1746 |
| 67.247 | 4.48  | Eremophila-7(11),9-dien-8-one | 1800 |
| 74.691 | 2.36  | Columellarin                  | 1948 |



## 8.) Tarragon

| RT     | Area % | Component                       | RI   |
|--------|--------|---------------------------------|------|
| 11.686 | 0.96   | Pinene <alpha>                  | 930  |
| 12.56  | 0.05   | Camphene                        | 947  |
| 13.792 | 0.08   | Sabinene                        | 971  |
| 14.081 | 0.12   | Pinene <beta>                   | 976  |
| 14.717 | 0.12   | Myrcene                         | 987  |
| 15.717 | 0.03   | Hexenyl acetate                 | 1003 |
| 16.873 | 0.02   | Terpinene <alpha>               | 1021 |
| 17.144 | 2.7    | Limonene                        | 1026 |
| 17.56  | 6.14   | Ocimene <Z,beta>                | 1032 |
| 18.228 | 6.33   | Ocimene <E,beta>                | 1043 |
| 20.016 | 0.06   | Pinene oxide <alpha>            | 1071 |
| 21.428 | 0.05   | Pinene oxide <beta>             | 1092 |
| 21.738 | 0.04   | Linalool                        | 1097 |
| 23.629 | 0.24   | Ocimene                         | 1125 |
| 23.755 | 0.03   | Epoxy ocimene <cis>             | 1126 |
| 24.415 | 0.06   | Epoxy ocimene <trans>           | 1136 |
| 28.565 | 81.75  | Methyl chavicol                 | 1197 |
| 32.101 | 0.02   | Tarragon                        | 1249 |
| 33.237 | 0.1    | Decen-1-ol <2E>                 | 1266 |
| 34.258 | 0.09   | Bornyl acetate                  | 1281 |
| 38.686 | 0.2    | Eugenol                         | 1349 |
| 40.862 | 0.09   | Methyl cinnamate <E>            | 1382 |
| 41.88  | 0.34   | Methyleugenol                   | 1398 |
| 43.03  | 0.02   | Caryophyllene <trans>           | 1417 |
| 46.865 | 0.04   | Germacrene D                    | 1478 |
| 47.553 | 0.04   | Farnesene                       | 1490 |
| 49.254 | 0.03   | Geranyl isobutanoate            | 1518 |
| 52.2   | 0.03   | Cinnamaldehyde <E,para-methoxy> | 1568 |
| 52.58  | 0.19   | Spathulenol                     | 1574 |
| 60.775 | 0.03   | Hemianin                        | 1721 |

## 9.) Davana

| RT     | Area% | Component             | RI   |
|--------|-------|-----------------------|------|
| 16.858 | 0.3   | Cymene <para>         | 1021 |
| 21.727 | 0.38  | Linalool              | 1097 |
| 21.954 | 0.33  | 2-methylbutyrate      | 1100 |
| 37.398 | 0.45  | Elemene <delta>       | 1329 |
| 40.24  | 0.98  | Ethyl cinnamate <cis> | 1372 |
| 40.49  | 0.71  | Geranyl acetate       | 1376 |
| 40.835 | 0.55  | Methyl cinnamate <E>  | 1382 |
| 45.555 | 0.48  | Alloaromadendrene     | 1457 |
| 46.072 | 4.35  | Ethyl cinnamate <E>   | 1465 |
| 46.88  | 0.82  | Germacrene D          | 1478 |
| 47.105 | 1.28  | Davana ether 1        | 1482 |
| 47.371 | 1.25  | Selinene <beta>       | 1487 |
| 47.49  | 0.37  | Viridiflorene         | 1489 |
| 47.782 | 8.45  | Bicyclogermacrene     | 1493 |
| 48.294 | 4.3   | Davana ether 2        | 1502 |
| 48.385 | 1.03  | Davana ether 3        | 1504 |
| 48.846 | 0.25  | Amorphene <delta>     | 1511 |
| 49.448 | 2.6   | Davana ether 4        | 1522 |
| 49.764 | 0.29  | Artedouglasia oxide A | 1527 |
| 51.081 | 0.51  | Davanone B            | 1549 |
| 51.481 | 1.61  | Davanone C            | 1556 |
| 51.803 | 0.6   | Nerolidol <trans>     | 1561 |
| 52.6   | 0.87  | Spathulenol           | 1575 |
| 52.874 | 63.41 | Davanone              | 1579 |
| 56.382 | 1.25  | Cadinol <epi,alpha>   | 1641 |
| 57.08  | 0.74  | Eudesmol <alpha>      | 1654 |

## 10.) Mugwort

| RT     | Area % | Component                 | RI   |
|--------|--------|---------------------------|------|
| 11.221 | 3.46   | Santolina triene          | 901  |
| 12.945 | 4.42   | Pinene <alpha>            | 932  |
| 13.78  | 2.95   | Fenchene <alpha>          | 947  |
| 13.879 | 0.82   | Camphene                  | 948  |
| 15.172 | 3.78   | Sabinene                  | 971  |
| 15.494 | 10.96  | Pinene <beta>             | 977  |
| 16.44  | 1.24   | Yomogi alcohol            | 993  |
| 18.372 | 1.68   | Cymene <para>             | 1023 |
| 18.678 | 1.24   | Limonene                  | 1028 |
| 18.892 | 9.41   | 1,8-cineole               | 1031 |
| 19.771 | 0.74   | Ocimene <E,beta>          | 1044 |
| 22.009 | 0.91   | Artemisia alcohol         | 1078 |
| 23.451 | 2.49   | Filifolone                | 1100 |
| 23.894 | 5.9    | Thujone <cis>             | 1106 |
| 24.526 | 4.42   | Chrysanthenol <trans>     | 1115 |
| 24.67  | 1.59   | Thujone <trans>           | 1117 |
| 24.911 | 1.53   | Chrysanthenone            | 1120 |
| 25.95  | 2.18   | 4,5-epoxy-carene <E>      | 1135 |
| 26.332 | 1.14   | Eucarvone                 | 1141 |
| 26.715 | 1.13   | Camphor                   | 1146 |
| 29.033 | 1.13   | Terpinen-4-ol             | 1179 |
| 30.051 | 1.25   | Terpineol <alpha>         | 1194 |
| 44.293 | 0.91   | Gurjunene <alpha>         | 1406 |
| 45.089 | 12.07  | Caryophyllene <E>         | 1418 |
| 47.144 | 1.14   | Farnesene <E,beta>        | 1451 |
| 47.34  | 1.63   | Humulene <alpha>          | 1454 |
| 48.933 | 8.27   | Germacrene D              | 1479 |
| 51.19  | 1.08   | Cadinene <delta>          | 1516 |
| 51.532 | 1.77   | Sesquiphellandrene <beta> | 1522 |
| 54.755 | 8.76   | Davanone                  | 1576 |

## 11.) Palo Santo

| RT     | Area % | Component                         | RI   |
|--------|--------|-----------------------------------|------|
| 12.977 | 0.11   | Pinene <alpha>                    | 932  |
| 15.888 | 0.12   | Octen-2-ol <3E>                   | 984  |
| 15.969 | 0.14   | Acetylcyclohexane                 | 985  |
| 16.147 | 0.3    | Myrcene                           | 988  |
| 16.242 | 0.18   | 1,8-cineole <dehydro>             | 990  |
| 18.417 | 0.77   | Cymene <para>                     | 1024 |
| 18.807 | 70.7   | Limonene                          | 1030 |
| 18.885 | 0.11   | Phellandrene <beta>               | 1031 |
| 18.962 | 0.15   | 1,8-cineole                       | 1032 |
| 24.969 | 0.26   | Mentha-2,8-dien-1-ol <trans,para> | 1121 |
| 25.985 | 0.34   | Mentha-2,8-dien-1-ol <cis,para>   | 1136 |
| 26.894 | 0.13   | Terpineol <cis,beta>              | 1149 |
| 27.366 | 0.38   | Menthone                          | 1156 |
| 27.898 | 12.87  | Menthofuran                       | 1163 |
| 28.93  | 0.21   | 1,8-menthadien-4-ol <para>        | 1178 |
| 30.11  | 7.87   | Terpineol <alpha>                 | 1195 |
| 30.291 | 0.23   | Dihydro carvone <cis>             | 1197 |
| 30.425 | 0.28   | Piperitol <Z>                     | 1199 |
| 31.706 | 0.39   | Carveol <trans>                   | 1218 |
| 32.619 | 0.14   | Carveol <cis>                     | 1231 |
| 33.044 | 0.92   | Pulegone                          | 1237 |
| 33.428 | 0.82   | Carvone                           | 1243 |
| 43.184 | 0.19   | Elemene <beta>                    | 1388 |
| 46.991 | 0.28   | Myrtayl-4(12)-ene                 | 1448 |
| 48.588 | 0.4    | Cadina-1(6),4-diene <trans>       | 1474 |
| 48.977 | 1.1    | Germacrene D                      | 1480 |
| 49.854 | 0.24   | Menthylactone                     | 1494 |
| 50.391 | 0.16   | Farnesene <E,E,alpha>             | 1503 |
| 51.235 | 0.21   | Cadinene <delta>                  | 1517 |

## 12.) Blue Cypress

| RT     | Area % | Component                   | RI   |
|--------|--------|-----------------------------|------|
| 11.817 | 0.27   | Pinene <alpha>              | 933  |
| 14.625 | 0.4    | Hept-5-en-2-one <6-methyl>  | 986  |
| 36.228 | 0.39   | Citronellic acid            | 1311 |
| 36.949 | 1.92   | Geranate <methyl>           | 1322 |
| 41.355 | 0.33   | Elemene <beta>              | 1390 |
| 42.901 | 0.7    | Jasmine lactone <cis>       | 1415 |
| 46.581 | 3.01   | Neocallitropsene <alpha>    | 1474 |
| 47.398 | 0.48   | Dihydroagarofuran           | 1487 |
| 47.572 | 5.22   | Selinene <beta>             | 1490 |
| 48.005 | 4.17   | Selinene <alpha>            | 1497 |
| 51.143 | 1.32   | Elemol <alpha>              | 1550 |
| 54.011 | 13.36  | Guaiol                      | 1599 |
| 54.913 | 0.49   | Eudesmol <5-epi,7-epi,beta> | 1615 |
| 56.008 | 10.28  | gamma-Eudesmol              | 1635 |
| 56.447 | 0.32   | Hinesol                     | 1642 |
| 57.331 | 25.02  | Eudesmol <alpha>            | 1658 |
| 57.485 | 1.89   | Selin-11-en-4-alpha-ol      | 1661 |
| 57.892 | 20.47  | Bulnesol                    | 1668 |
| 64.016 | 1.37   | Methyl aciphyllate          | 1781 |
| 66.069 | 0.61   | Callitrin                   | 1822 |
| 68.16  | 0.29   | Callistrin A                | 1862 |
| 70.175 | 1.67   | Dihydrocostunilide          | 1903 |
| 72.572 | 0.46   | Columellarin                | 1952 |

### 13.) Caraway

| RT     | Area % | Component                         | RI   |
|--------|--------|-----------------------------------|------|
| 11.15  | 0.03   | Heptanal                          | 901  |
| 15.095 | 0.02   | Sabinene                          | 971  |
| 16.025 | 0.13   | Myrcene                           | 987  |
| 16.905 | 0.04   | n-Octanal                         | 1002 |
| 18.555 | 26.58  | Limonene                          | 1028 |
| 23.31  | 0.04   | Linalool                          | 1098 |
| 24.84  | 0.1    | Mentha-2,8-dien-1-ol <trans,para> | 1120 |
| 25.85  | 0.12   | Mentha-2,8-dien-1-ol <cis,para>   | 1135 |
| 27.5   | 0.02   | Nonen-1-al <2E>                   | 1158 |
| 27.8   | 0.07   | Cyclohexadiene                    | 1163 |
| 29.435 | 0.04   | Mentha-1(7),8-dien-2-ol <trans,p> | 1186 |
| 29.945 | 0.17   | Terpineol <alpha>                 | 1194 |
| 30.14  | 0.43   | Dihydro carvone <cis>             | 1197 |
| 30.3   | 0.09   | Piperitol <cis>                   | 1198 |
| 30.595 | 0.18   | Dihydro carvone <trans>           | 1203 |
| 31.51  | 0.13   | Dihydrocarveol                    | 1216 |
| 31.62  | 0.22   | Carveol <trans>                   | 1217 |
| 32.33  | 0.03   | Carveol <cis>                     | 1228 |
| 32.445 | 0.62   | Dihydro carveol                   | 1230 |
| 33.255 | 70.34  | Carvone                           | 1244 |
| 35.46  | 0.2    | Perilla aldehyde                  | 1274 |
| 38.565 | 0.02   | Geranate <methyl>                 | 1319 |
| 39.31  | 0.03   | Carvyl acetate <trans>            | 1331 |
| 44.98  | 0.11   | Caryophyllene <trans>             | 1418 |
| 47.065 | 0.07   | Farnesene <E,beta>                | 1451 |
| 48.875 | 0.02   | Germacrene D                      | 1479 |
| 51.49  | 0.08   | Dehydro Lachnophyllum ester       | 1523 |
| 54.93  | 0.07   | Caryophyllene oxide               | 1580 |

#### 14.) Katrafay

| RT     | Area % | Component                  | RI   |
|--------|--------|----------------------------|------|
| 15.653 | 0.95   | Pinene <beta>              | 977  |
| 42.003 | 1.19   | Isoledene                  | 1368 |
| 42.472 | 9.2    | Copaene <alpha>            | 1375 |
| 43.357 | 8.52   | Elemene <beta>             | 1388 |
| 44.19  | 1.06   | Sesquithujene              | 1401 |
| 44.259 | 1.23   | Cyperene                   | 1402 |
| 45.299 | 0.7    | Caryophyllene <trans>      | 1419 |
| 46.956 | 3.69   | Myrtal-4(12)-ene           | 1445 |
| 47.413 | 1.13   | Farnesene <E,beta>         | 1452 |
| 47.593 | 10.81  | Cedrolopsi                 | 1455 |
| 47.839 | 2.32   | (-)-Alloaromadendrene      | 1459 |
| 47.959 | 1.84   | Rotundene                  | 1461 |
| 48.082 | 0.67   | Acoradiene <alpha>         | 1463 |
| 48.439 | 29.5   | Ishwarene                  | 1469 |
| 48.732 | 2.45   | Caryophyllene <9-epi>      | 1473 |
| 48.932 | 0.84   | Curcumene <gamma>          | 1477 |
| 49.132 | 5.2    | Curcumene                  | 1480 |
| 49.376 | 2.01   | Aristolochene              | 1484 |
| 49.65  | 1.15   | Selinene <beta>            | 1488 |
| 49.856 | 0.73   | Valencene                  | 1491 |
| 50.129 | 3.51   | Guaine <Z,beta>            | 1496 |
| 50.231 | 1.52   | Murolene <alpha>           | 1497 |
| 50.789 | 1.24   | Bisabolene <beta>          | 1506 |
| 50.896 | 1.26   | Curcumene <beta>           | 1508 |
| 51.124 | 1.09   | Sesquicineole              | 1512 |
| 51.408 | 2.43   | Cadinene <delta>           | 1517 |
| 51.609 | 2.03   | Calamenene <trans>         | 1520 |
| 55.23  | 0.92   | Caryophyllene oxide <beta> | 1581 |
| 61.232 | 0.81   | Bisabolol <alpha>          | 1686 |

## 15.) Atlas Cedarwood (1)

| RT     | Area % | Component                    | RI   |
|--------|--------|------------------------------|------|
| 27.924 | 1.09   | 4-Acetyl-1-methylcyclohexene | 1136 |
| 44.764 | 0.32   | Isolongofolene <4,5-dehydro> | 1391 |
| 46.121 | 0.59   | Gurjunene <alpha>            | 1413 |
| 46.755 | 0.52   | Caryophyllene <9-epi,cis>    | 1423 |
| 47.466 | 0.38   | 6,9-guaiadiene               | 1434 |
| 48.354 | 0.49   | Vestitenone                  | 1449 |
| 49.35  | 16.12  | Caryophyllene <9-epi>        | 1465 |
| 49.757 | 0.21   | Cedarwood                    | 1472 |
| 50.441 | 0.33   | Himachalene <gamma>          | 1483 |
| 51.006 | 10.74  | Viridiflorene                | 1492 |
| 51.24  | 2.33   | Himachalene <beta>           | 1496 |
| 52.443 | 42.62  | Curcumene <beta>             | 1516 |
| 52.699 | 0.99   | Himachalene <alpha,dehydro>  | 1520 |
| 53.053 | 2.59   | Cadinene <delta>             | 1526 |
| 53.691 | 2.54   | Himachalene <gamma,dehydro>  | 1537 |
| 54.131 | 1.49   | Bisabolene <trans,alpha>     | 1545 |
| 54.5   | 1.03   | Calacorene <alpha>           | 1551 |
| 56.341 | 0.54   | Himachalene epoxide          | 1582 |
| 58.336 | 0.31   | Ledol                        | 1617 |
| 58.78  | 0.5    | Epi-Cedrol                   | 1625 |
| 59.496 | 0.74   | Cubenol <1-epi>              | 1638 |
| 59.744 | 0.17   | Himachalol <alpha>           | 1643 |
| 61.166 | 1.08   | Bisabolol <6-epi,alpha>      | 1668 |
| 61.845 | 1.04   | Cedranol <5-neo>             | 1680 |
| 62.539 | 1.04   | Atlantone <Z,gamma>          | 1693 |
| 63.195 | 2.62   | Atlantone <E,gamma>          | 1705 |
| 63.906 | 0.93   | Atlantone <Z,alpha>          | 1718 |
| 67.234 | 4.62   | Atlantone <E,alpha>          | 1781 |



## 16.) Atlas Cedarwood (2)

| RT     | Area% | Component               | RI   |
|--------|-------|-------------------------|------|
| 12.937 | 0.17  | Pinene <alpha>          | 932  |
| 42.683 | 0.69  | Funebrene <2-epi,alpha> | 1381 |
| 42.964 | 0.88  | Duprezianene <alpha>    | 1385 |
| 43.866 | 0.19  | Longipinene <beta>      | 1399 |
| 43.997 | 0.21  | Chamipinene <alpha>     | 1401 |
| 44.912 | 31.4  | Cedrene <alpha>         | 1415 |
| 45.087 | 1.55  | Caryophyllene <E>       | 1418 |
| 45.385 | 6.08  | Funberene <beta>        | 1423 |
| 46.094 | 20.45 | Thujopsene <cis>        | 1434 |
| 46.23  | 0.16  | Isobazzanene            | 1436 |
| 47.099 | 0.21  | Prezizaene              | 1450 |
| 47.854 | 0.17  | Acoradiene <alpha>      | 1462 |
| 48     | 0.42  | Acoradiene <beta>       | 1465 |
| 48.948 | 1.12  | Gurjunene <gamma>       | 1480 |
| 50.311 | 1.77  | Himachalene <beta>      | 1501 |
| 50.377 | 1.55  | Pseudowiddrene          | 1502 |
| 50.486 | 0.66  | Chamigrene <alpha>      | 1504 |
| 50.619 | 1.14  | Cuparene                | 1507 |
| 51.178 | 0.32  | Alaskene                | 1516 |
| 52.181 | 1.74  | Cuprenene <gamma>       | 1533 |
| 52.572 | 0.23  | Liguloxide              | 1539 |
| 52.939 | 0.24  | Cuprenene <delta>       | 1545 |
| 56.478 | 3.25  | Widdrol                 | 1605 |
| 56.615 | 23.52 | Cedrol                  | 1608 |
| 57.386 | 0.31  | Cedrol <epi>            | 1621 |
| 58.48  | 0.36  | Sesquiterpineol         | 1640 |
| 59.252 | 0.28  | Thujopsanone <3>        | 1654 |
| 59.653 | 0.25  | Cedr-8-en-15-ol         | 1661 |
| 60.875 | 0.38  | Bisabolol <alpha>       | 1683 |
| 62.119 | 0.3   | Thujopsenal <cis>       | 1705 |

## 17.) Hinoki Cypress

| RT     | Area% | Component                   | RI   |
|--------|-------|-----------------------------|------|
| 13.008 | 42.62 | Pinene <alpha>              | 933  |
| 15.208 | 1.72  | Sabinene                    | 972  |
| 15.526 | 0.48  | Pinene <beta>               | 977  |
| 16.148 | 1.49  | Myrcene                     | 988  |
| 17.922 | 0.28  | Terpinene <alpha>           | 1017 |
| 18.72  | 1.93  | Limonene                    | 1029 |
| 20.628 | 0.71  | Terpinene <gamma>           | 1057 |
| 22.469 | 0.6   | Terpinolene                 | 1085 |
| 29.082 | 0.51  | Terpinen-4-ol               | 1180 |
| 30.086 | 0.46  | Terpineol <alpha>           | 1195 |
| 36.221 | 0.98  | Bornyl acetate              | 1284 |
| 40.355 | 2.13  | Terpynyl acetate <alpha>    | 1346 |
| 43.19  | 1.55  | Elemene <beta>              | 1389 |
| 47.792 | 0.31  | Muurolo-4(14),5-diene <cis> | 1461 |
| 48.413 | 0.42  | Cadina-1(6),4-diene <cis>   | 1471 |
| 48.593 | 2.07  | Cadina-1(6),4-diene <trans> | 1474 |
| 48.983 | 0.47  | Germacrene D                | 1480 |
| 49.481 | 0.4   | Selinene <beta>             | 1488 |
| 49.916 | 0.61  | Valencene                   | 1495 |
| 50.057 | 3.1   | Muurolole <alpha>           | 1497 |
| 50.946 | 5.14  | Amorphene <delta>           | 1512 |
| 51.254 | 9.69  | Cadinene <delta>            | 1517 |
| 52.347 | 0.61  | Cadinene <alpha>            | 1536 |
| 53.026 | 0.34  | Elemol                      | 1547 |
| 57.697 | 0.65  | Cubenol <1-epi>             | 1627 |
| 58.503 | 4.11  | Muurolol <alpha>            | 1641 |
| 58.617 | 5.49  | Murrolol <epi, alpha>       | 1643 |
| 58.763 | 1.84  | Cadinol <delta>             | 1645 |
| 59.265 | 8.88  | Cadinol <alpha>             | 1654 |
| 59.436 | 0.41  | Selin-11-en-4-alpha-ol      | 1657 |

## 18.) Chamomile

| RT     | Area% | Component                         | RI   |
|--------|-------|-----------------------------------|------|
| 9.781  | 1.94  | Isobutyl isobutyrate              | 913  |
| 10.765 | 3.97  | Pinene <alpha>                    | 932  |
| 10.966 | 2.88  | Methacrylic acid, isobutyl ester  | 936  |
| 11.605 | 1.19  | Camphene                          | 948  |
| 11.729 | 1.19  | Fruitaleur                        | 950  |
| 13.873 | 0.52  | Ethyl tiglate                     | 991  |
| 14.486 | 0.63  | Isobutyl 2-methylbutanoate        | 1003 |
| 15.084 | 0.51  | Isoamyl isobutyrate               | 1012 |
| 15.277 | 3.16  | 2-Methylbutyl isobutyrate         | 1015 |
| 16.805 | 1.7   | Isopentyl methacrylate            | 1039 |
| 16.881 | 3.37  | Prenyl                            | 1040 |
| 17.441 | 14.84 | Isobutyl angelate                 | 1049 |
| 18.305 | 8.75  | Methallyl angelate                | 1063 |
| 19.57  | 0.34  | Camphenilone                      | 1083 |
| 19.904 | 0.46  | Butyl angelate                    | 1088 |
| 20.885 | 0.81  | Butyrate <2-methyl,3-methylbutyl> | 1103 |
| 21.731 | 1.26  | Hexyl isobutyrate                 | 1115 |
| 23.368 | 4.39  | Pinocarveol <trans>               | 1139 |
| 23.676 | 3.8   | Butanoic acid <ester>             | 1144 |
| 23.892 | 7.61  | Isoamyl angelate                  | 1147 |
| 24.178 | 16.9  | Isoamyl tiglate                   | 1151 |
| 24.345 | 0.6   | Terpineol <E,beta>                | 1154 |
| 24.839 | 2.18  | Pinocarvone                       | 1161 |
| 25.489 | 0.65  | Borneol                           | 1171 |
| 26.819 | 1.26  | Angelate <2-methyl-2-butene>      | 1190 |
| 27.088 | 0.59  | Myrtenol                          | 1194 |
| 30.086 | 0.37  | 2-methyl-2-butenate <2E>          | 1238 |
| 30.95  | 11.42 | 3-methyl-pentylangelate           | 1251 |
| 45.67  | 2.32  | Germacrene D                      | 1477 |
| 47.243 | 0.39  | Farnesene <E,E,alpha>             | 1503 |

## 19.) Wild Vetiver

| RT     | Area% | Component                              | RI   |
|--------|-------|----------------------------------------|------|
| 47.102 | 0.9   | Prezizaene                             | 1450 |
| 47.394 | 0.92  | Khusimene                              | 1455 |
| 53.322 | 0.78  | Vetivenene <beta>                      | 1552 |
| 55.004 | 0.57  | Caryophyllene oxide                    | 1580 |
| 56.356 | 7.47  | Khusimone                              | 1603 |
| 56.908 | 1.53  | Farnesol <2Z,6Z>                       | 1613 |
| 57.36  | 1.08  | Selina-6-en-4-ol                       | 1621 |
| 58.156 | 0.94  | Caryophylla-4(12),8(13)-dien-5 beta-ol | 1635 |
| 58.547 | 1.13  | Cedrenal <1,7-diepi,alpha>             | 1642 |
| 58.681 | 4.41  | Khusilal                               | 1644 |
| 59.136 | 2.66  | Cadinol <alpha>                        | 1652 |
| 59.321 | 1.45  | Intermedeol                            | 1655 |
| 59.475 | 0.8   | Himachalol                             | 1658 |
| 59.74  | 0.61  | Vetiver                                | 1663 |
| 59.834 | 2.21  | Caryophyllene <14-hydroxy,Z>           | 1664 |
| 60.056 | 10.64 | Caryophyllene <14-hydroxy,9-epi,E>     | 1668 |
| 60.338 | 5.13  | Khusinol                               | 1673 |
| 60.429 | 1.8   | Uvetiver                               | 1675 |
| 60.975 | 1.43  | Zizanone <epi>                         | 1685 |
| 61.079 | 5.03  | Nootkatol                              | 1686 |
| 61.378 | 4.83  | Acoranol                               | 1692 |
| 61.604 | 2.28  | Acorenone B                            | 1696 |
| 61.736 | 3     | Amorphadienol                          | 1698 |
| 64.222 | 26.38 | Khusimol                               | 1744 |
| 64.445 | 1.29  | Cyclocolorenone                        | 1748 |
| 64.974 | 0.95  | Curcumen-12-ol <beta,Z>                | 1758 |
| 67.249 | 9.78  | Vetivenic acid <cis>                   | 1800 |

## 20.) Ravintsara

| RT     | Area% | Component                   | RI   |
|--------|-------|-----------------------------|------|
| 12.529 | 0.84  | Thujene <alpha>             | 925  |
| 12.958 | 4.72  | Pinene <alpha>              | 932  |
| 13.892 | 0.17  | Camphene                    | 948  |
| 15.198 | 12.79 | Sabinene                    | 972  |
| 15.507 | 3.3   | Pinene <beta>               | 977  |
| 16.125 | 1.39  | Myrcene                     | 988  |
| 17.226 | 0.06  | Phellandrene <alpha>        | 1006 |
| 17.898 | 0.88  | Terpinene <alpha>           | 1016 |
| 18.394 | 0.38  | Cymene <para>               | 1024 |
| 18.71  | 0.84  | Limonene                    | 1028 |
| 18.974 | 59.87 | 1,8-cineole                 | 1032 |
| 19.088 | 0.07  | Ocimene <Z,beta>            | 1034 |
| 19.788 | 0.31  | Ocimene <E,beta>            | 1045 |
| 20.605 | 1.38  | Terpinene <gamma>           | 1057 |
| 21.413 | 0.48  | Sabinene hydrate <cis>      | 1069 |
| 22.441 | 0.35  | Terpinolene                 | 1084 |
| 23.399 | 0.04  | Linalool                    | 1099 |
| 23.512 | 0.33  | Sabinene hydrate <trans>    | 1100 |
| 25.14  | 0.08  | Menth-2-en-1-ol <cis,para>  | 1124 |
| 26.382 | 0.04  | Menth-2-en-1ol <trans,para> | 1141 |
| 28.328 | 0.52  | Terpineol <delta>           | 1169 |
| 28.462 | 0.1   | Borneol                     | 1171 |
| 29.058 | 2.24  | Terpinen-4-ol               | 1180 |
| 30.079 | 6.93  | Terpineol <alpha>           | 1194 |
| 43.158 | 0.08  | Elemene <beta>              | 1388 |
| 45.105 | 0.55  | Caryophyllene <E>           | 1418 |
| 47.363 | 0.7   | Humulene <alpha>            | 1454 |
| 48.952 | 0.19  | Germacrene D                | 1480 |
| 49.451 | 0.08  | Selinene <beta>             | 1488 |
| 49.854 | 0.29  | Bicyclogermacrene           | 1494 |

## 21.) Sugandha Kokila

| RT     | Area % | Component             | RI   |
|--------|--------|-----------------------|------|
| 11.302 | 0.59   | Thujene <alpha>       | 923  |
| 11.693 | 3.51   | Pinene <alpha>        | 931  |
| 12.565 | 0.1    | Camphene              | 947  |
| 13.8   | 3.64   | Sabinene              | 971  |
| 14.091 | 4.35   | Pinene <beta>         | 976  |
| 14.72  | 1.83   | Myrcene               | 987  |
| 15.758 | 12.53  | Phellandrene <alpha>  | 1004 |
| 16.39  | 1.37   | Terpinene <alpha>     | 1014 |
| 16.871 | 3.6    | Cymene <para>         | 1021 |
| 17.161 | 1.87   | Limonene              | 1026 |
| 17.268 | 8.46   | Phellandrene <beta>   | 1028 |
| 17.361 | 20.61  | 1,8-cineole           | 1029 |
| 18.221 | 0.44   | Ocimene <E,beta>      | 1042 |
| 18.984 | 1.82   | Terpinene <gamma>     | 1055 |
| 20.756 | 0.42   | Terpinolene           | 1082 |
| 21.736 | 2.48   | Linalool              | 1097 |
| 24.926 | 1.76   | Camphor               | 1144 |
| 27.227 | 2.78   | Terpinen-4-ol         | 1177 |
| 28.242 | 4.08   | Terpineol <alpha>     | 1192 |
| 33.187 | 0.35   | Geranial              | 1265 |
| 40.261 | 1.34   | Copaene <alpha>       | 1373 |
| 40.879 | 12.37  | Methyl-cinnamate <E>  | 1382 |
| 41.895 | 1.21   | Methyleugenol         | 1399 |
| 43.047 | 2.47   | Caryophyllene <trans> | 1417 |
| 47.374 | 0.33   | Selinene <beta>       | 1487 |
| 47.816 | 0.65   | Methyl isoeugenol <E> | 1494 |
| 48.585 | 0.38   | Bisabolene <beta>     | 1507 |
| 49.171 | 1.03   | Cadinene <delta>      | 1517 |
| 49.299 | 3.34   | Myristicin            | 1519 |
| 50.924 | 0.29   | Elemicin              | 1546 |

## 22.) Neroli

| RT     | Area% | Component                | RI   |
|--------|-------|--------------------------|------|
| 12.937 | 0.26  | Pinene <alpha>           | 932  |
| 15.163 | 0.49  | Sabinene                 | 971  |
| 15.483 | 3.88  | Pinene <beta>            | 977  |
| 16.102 | 1.38  | Myrcene                  | 987  |
| 17.874 | 0.04  | Terpinene <alpha>        | 1016 |
| 18.364 | 0.03  | Cymene <para>            | 1023 |
| 18.678 | 9.18  | Limonene                 | 1028 |
| 18.785 | 0.05  | Phellandrene <beta>      | 1030 |
| 19.063 | 0.78  | Ocimene <Z,beta>         | 1034 |
| 19.764 | 3.8   | Ocimene <E,beta>         | 1044 |
| 20.576 | 0.07  | Terpinene <gamma>        | 1056 |
| 21.408 | 0.09  | Linalool oxide <cis>     | 1069 |
| 22.415 | 0.33  | Terpinolene              | 1084 |
| 22.505 | 0.06  | Linalool oxide <trans>   | 1085 |
| 23.438 | 39.44 | Linalool                 | 1099 |
| 25.951 | 0.05  | Benzeneacetonitrile      | 1135 |
| 29.023 | 0.12  | Terpinen-4-ol            | 1179 |
| 30.031 | 3.31  | Terpineol <alpha>        | 1194 |
| 32.007 | 0.64  | Nerol                    | 1222 |
| 33.793 | 26.71 | Linalyl acetate          | 1248 |
| 34.058 | 0.21  | 2-phenyl ethyl acetate   | 1252 |
| 36.515 | 0.05  | Indole                   | 1288 |
| 39.809 | 0.17  | Anthranilate <methyl>    | 1337 |
| 40.293 | 0.1   | Terpinyl acetate <alpha> | 1345 |
| 41.059 | 1.76  | Neryl acetate            | 1356 |
| 42.351 | 3.48  | Geranyl acetate          | 1376 |
| 45.066 | 0.5   | Caryophyllene <E>        | 1418 |
| 49.808 | 0.11  | Bicyclogermacrene        | 1493 |
| 53.712 | 1.7   | Nerolidol <E>            | 1558 |
| 62.476 | 1.21  | Farnesol <2E,6Z>         | 1712 |

### 23.) Petitgrain

| RT     | Area% | Component                | RI   |
|--------|-------|--------------------------|------|
| 12.531 | 0.02  | Thujene <alpha>          | 925  |
| 12.955 | 0.12  | Pinene <alpha>           | 932  |
| 15.183 | 0.2   | Sabinene                 | 971  |
| 15.501 | 0.83  | Pinene <beta>            | 977  |
| 16.123 | 1.75  | Myrcene                  | 988  |
| 17.222 | 0.04  | Phellandrene <alpha>     | 1006 |
| 17.372 | 0.34  | Carene <delta-3>         | 1008 |
| 17.897 | 0.04  | Terpinene <alpha>        | 1016 |
| 18.69  | 0.75  | Limonene                 | 1028 |
| 18.802 | 0.04  | Phellandrene <beta>      | 1030 |
| 18.909 | 0.08  | 1,8-cineole              | 1031 |
| 19.085 | 0.64  | Ocimene <Z,beta>         | 1034 |
| 19.784 | 1.89  | Ocimene <E,beta>         | 1045 |
| 20.604 | 0.07  | Terpinene <gamma>        | 1057 |
| 21.436 | 0.04  | Linalool oxide <cis>     | 1069 |
| 22.437 | 0.38  | Terpinolene              | 1084 |
| 23.417 | 21.09 | Linalool                 | 1099 |
| 29.051 | 0.09  | Terpinen-4-ol            | 1180 |
| 30.056 | 4.64  | Terpineol <alpha>        | 1194 |
| 32.037 | 0.72  | Nerol                    | 1223 |
| 33.824 | 59.35 | Linalyl acetate          | 1249 |
| 35.024 | 0.04  | Geranial                 | 1266 |
| 40.324 | 0.1   | Terpinyl acetate <alpha> | 1345 |
| 41.088 | 2.07  | Neryl acetate            | 1357 |
| 42.378 | 3.63  | Geranyl acetate          | 1376 |
| 45.098 | 0.61  | Caryophyllene <E>        | 1418 |
| 47.354 | 0.05  | Humulene <alpha>         | 1454 |
| 49.839 | 0.18  | Bicyclogermacrene        | 1494 |
| 51.217 | 0.02  | Cadinene <delta>         | 1517 |
| 53.739 | 0.18  | Nerolidol <E>            | 1559 |



## 24.) Bergamot

| RT     | Area% | Component                 | RI   |
|--------|-------|---------------------------|------|
| 12.22  | 0.34  | Thujene <alpha>           | 922  |
| 12.637 | 1.38  | Pinene <alpha>            | 930  |
| 13.558 | 0.03  | Camphene                  | 946  |
| 14.842 | 1.26  | Sabinene                  | 969  |
| 15.156 | 8.3   | Pinene <beta>             | 975  |
| 15.781 | 0.78  | Myrcene                   | 986  |
| 16.671 | 0.02  | Octanal                   | 1001 |
| 16.862 | 0.02  | Phellandrene <alpha>      | 1004 |
| 17.528 | 0.06  | Terpienene <alpha>        | 1014 |
| 18.016 | 0.23  | Cymene <para>             | 1022 |
| 18.356 | 37.79 | Limonene                  | 1027 |
| 18.442 | 0.04  | Phellandrene <beta>       | 1028 |
| 18.717 | 0.04  | Ocimene <Z,beta>          | 1032 |
| 19.409 | 0.07  | Ocimene <E,beta>          | 1043 |
| 20.216 | 9.1   | Terpinene <gamma>         | 1055 |
| 21.058 | 0.05  | Mentha-3,8-diene <para>   | 1068 |
| 22.027 | 0.31  | Terpinolene               | 1082 |
| 22.261 | 0.02  | Fenchone                  | 1086 |
| 22.997 | 8.5   | Linalool                  | 1097 |
| 23.358 | 0.03  | n-Nonanal                 | 1102 |
| 26.614 | 0.02  | Citronellal               | 1149 |
| 28.592 | 0.03  | Terpinen-4-ol             | 1177 |
| 29.598 | 0.08  | Terpineol <alpha>         | 1192 |
| 30.387 | 0.01  | Decanal                   | 1203 |
| 30.672 | 0.03  | Octyl acetate             | 1207 |
| 32.533 | 0.28  | Neral                     | 1234 |
| 33.365 | 29.48 | Linalyl acetate           | 1246 |
| 34.557 | 0.51  | Geranial                  | 1264 |
| 39.843 | 0.03  | Terpinyl acetate <alpha>  | 1343 |
| 40.045 | 0.01  | Citronellyl acetate       | 1346 |
| 40.62  | 0.28  | Neryl acetate             | 1354 |
| 41.91  | 0.2   | Geranyl acetate           | 1374 |
| 44.178 | 0.02  | Bergamotene <cis,alpha>   | 1409 |
| 44.587 | 0.11  | Caryophyllene <trans>     | 1415 |
| 45.439 | 0.2   | Bergamotene <alpha,trans> | 1429 |
| 49.649 | 0.02  | Bisabolene <Z,alpha>      | 1496 |
| 49.88  | 0.02  | Farnesene <E,E,alpha>     | 1500 |
| 50.095 | 0.3   | Bisabolene <beta>         | 1503 |

## 25.) Clementine

| RT     | Area% | Component              | RI   |
|--------|-------|------------------------|------|
| 11.299 | 0.01  | Thujene <alpha>        | 923  |
| 11.686 | 0.64  | Pinene <alpha>         | 930  |
| 13.793 | 0.75  | Sabinene               | 971  |
| 14.084 | 0.07  | Pinene <beta>          | 976  |
| 14.715 | 2.05  | Myrcene                | 987  |
| 15.593 | 0.15  | n-Octanal              | 1001 |
| 15.742 | 0.04  | Phellandrene <alpha>   | 1003 |
| 15.874 | 0.09  | Carene <delta-3>       | 1006 |
| 16.877 | 0.03  | Cymene <para>          | 1021 |
| 17.244 | 94.89 | Limonene               | 1027 |
| 18.238 | 0.03  | Ocimene <E,beta>       | 1043 |
| 18.979 | 0.17  | Terpinene <gamma>      | 1054 |
| 20.748 | 0.02  | Terpinolene            | 1082 |
| 21.729 | 0.29  | Linalool               | 1097 |
| 23.962 | 0.01  | Limonene oxide <cis>   | 1129 |
| 24.249 | 0.02  | Limonene oxide <trans> | 1134 |
| 25.318 | 0.03  | Citronellal            | 1149 |
| 28.245 | 0.05  | Terpineol <alpha>      | 1192 |
| 29.036 | 0.3   | n-Decanal              | 1204 |
| 31.563 | 0.03  | Carvone                | 1241 |
| 33.702 | 0.01  | Perilla aldehyde       | 1273 |
| 40.247 | 0.04  | Copaene <alpha>        | 1373 |
| 41.044 | 0.03  | Cubebene <beta>        | 1385 |
| 41.17  | 0.01  | Elemene <beta>         | 1387 |
| 42.547 | 0.04  | Dodecanal              | 1409 |
| 43.687 | 0.02  | Copaene <beta>         | 1427 |
| 46.87  | 0.03  | Germacrene D           | 1478 |
| 48.39  | 0.02  | Farnesene <E,E,alpha>  | 1504 |
| 49.157 | 0.03  | Cadinene <delta>       | 1517 |
| 62.301 | 0.1   | Sinensal <alpha>       | 1749 |

## 26.) Shiikuwasha

| RT     | Area% | Component                | RI   |
|--------|-------|--------------------------|------|
| 12.634 | 0.8   | Thujene <alpha>          | 924  |
| 13.065 | 3.13  | Pinene <alpha>           | 932  |
| 15.3   | 0.05  | Sabinene                 | 971  |
| 15.623 | 1.98  | Pinene <beta>            | 977  |
| 16.247 | 1.86  | Myrcene                  | 988  |
| 17.12  | 0.06  | Octanal                  | 1003 |
| 17.352 | 0.09  | Phellandrene <alpha>     | 1006 |
| 18.028 | 0.61  | Terpienene <alpha>       | 1016 |
| 18.527 | 5.72  | Cymene <para>            | 1024 |
| 18.891 | 55.35 | Limonene                 | 1029 |
| 18.974 | 0.05  | Phellandrene <beta>      | 1030 |
| 19.922 | 0.29  | Ocimene <E,beta>         | 1045 |
| 20.774 | 24.77 | Terpinene <gamma>        | 1057 |
| 22.579 | 1.41  | Terpinolene              | 1084 |
| 23.537 | 0.34  | Linalool                 | 1099 |
| 27.011 | 0.08  | Terpineol <cis,beta>     | 1148 |
| 29.199 | 0.52  | Terpinen-4-ol            | 1180 |
| 30.204 | 0.98  | Terpineol <alpha>        | 1194 |
| 30.971 | 0.12  | Decanal                  | 1205 |
| 31.252 | 0.07  | Octyl acetate            | 1209 |
| 40.482 | 0.05  | Terpinyl acetate <alpha> | 1345 |
| 42.429 | 0.08  | Copaene <alpha>          | 1375 |
| 43.313 | 0.09  | Elemene <beta>           | 1388 |
| 45.261 | 0.29  | Caryophyllene <trans>    | 1419 |
| 47.522 | 0.08  | Humulene <alpha>         | 1455 |
| 49.111 | 0.32  | Germacrene D             | 1480 |
| 49.721 | 0.09  | Viridiflorene            | 1490 |
| 50.009 | 0.23  | Bicyclogermacrene        | 1494 |
| 51.372 | 0.18  | Cadinene <delta>         | 1517 |
| 54.859 | 0.19  | Spathulenol              | 1575 |
| 56.046 | 0.04  | Cubeban-11-ol            | 1595 |
| 59.386 | 0.08  | Cadinol <alpha>          | 1654 |

## 27.) Yuzu

| RT     | Area % | Component                    | RI   |
|--------|--------|------------------------------|------|
| 12.571 | 0.3    | Thujene <alpha>              | 925  |
| 12.998 | 1.22   | Pinene <alpha>               | 933  |
| 15.229 | 0.27   | Sabinene                     | 972  |
| 15.548 | 0.69   | Pinene <beta>                | 978  |
| 16.171 | 1.72   | Myrcene                      | 989  |
| 17.037 | 0.23   | n-Octanal                    | 1003 |
| 18.443 | 4.29   | Cymene <para>                | 1024 |
| 18.815 | 80.56  | Limonene                     | 1030 |
| 18.894 | 0.04   | Phellandrene <beta>          | 1031 |
| 20.656 | 4.47   | Terpinene <gamma>            | 1058 |
| 21.439 | 0.23   | n-Octanol                    | 1069 |
| 22.491 | 0.11   | Terpinolene                  | 1085 |
| 23.449 | 1.27   | Linalool                     | 1100 |
| 23.808 | 0.16   | n-Nonanal                    | 1105 |
| 25.761 | 0.21   | Limonene oxide <cis>         | 1133 |
| 26.059 | 0.27   | Limonene oxide <trans>       | 1137 |
| 28.423 | 0.27   | n-Nonanol                    | 1171 |
| 30.111 | 0.31   | Terpineol <alpha>            | 1195 |
| 30.878 | 0.85   | n-Decanal                    | 1206 |
| 32.243 | 0.45   | Citronellol                  | 1226 |
| 33.042 | 0.06   | Neral                        | 1237 |
| 33.455 | 0.07   | Carvone                      | 1243 |
| 33.847 | 0.56   | Geraniol                     | 1249 |
| 35.07  | 0.1    | Geranial                     | 1267 |
| 36.559 | 0.1    | Thymol                       | 1289 |
| 40.262 | 0.33   | Menthene <1,2-diol>          | 1344 |
| 44.228 | 0.4    | Methyl anthranilate <methyl> | 1404 |
| 44.508 | 0.26   | Dodecanal                    | 1409 |
| 49.714 | 0.08   | Valencene                    | 1492 |
| 67.183 | 0.12   | Isovalencenol <E>            | 1799 |

## 28.) Lemon

| RT     | Area% | Component                 | RI   |
|--------|-------|---------------------------|------|
| 12.542 | 0.43  | Thujene <alpha>           | 925  |
| 12.971 | 2.01  | Pinene <alpha>            | 932  |
| 13.907 | 0.06  | Camphene                  | 949  |
| 15.203 | 1.59  | Sabinene                  | 972  |
| 15.54  | 12.47 | Pinene <beta>             | 978  |
| 16.144 | 1.59  | Myrcene                   | 988  |
| 17.009 | 0.05  | n-Octanal                 | 1003 |
| 17.244 | 0.04  | Phellandrene <alpha>      | 1007 |
| 17.918 | 0.21  | Terpinene <alpha>         | 1017 |
| 18.419 | 0.72  | Cymene <para>             | 1024 |
| 18.828 | 65.58 | Limonene                  | 1030 |
| 18.895 | 0.05  | Phellandrene <beta>       | 1031 |
| 18.972 | 0.03  | 1,8-cineole               | 1032 |
| 19.113 | 0.05  | Ocimene <Z,beta>          | 1034 |
| 19.811 | 0.1   | Ocimene <E,beta>          | 1045 |
| 20.649 | 9.63  | Terpinene <gamma>         | 1058 |
| 22.46  | 0.38  | Terpinolene               | 1085 |
| 23.423 | 0.15  | Linalool                  | 1099 |
| 23.778 | 0.11  | n-Nonanal                 | 1104 |
| 27.069 | 0.09  | Citronellal               | 1151 |
| 29.079 | 0.07  | Terpinen-4-ol             | 1180 |
| 30.086 | 0.15  | Terpineol <alpha>         | 1195 |
| 33.021 | 0.87  | Neral                     | 1237 |
| 35.054 | 1.54  | Geranial                  | 1267 |
| 41.133 | 0.53  | Neryl acetate             | 1357 |
| 42.422 | 0.43  | Geranyl acetate           | 1377 |
| 45.14  | 0.29  | Caryophyllene <E>         | 1419 |
| 45.977 | 0.31  | Bergamotene <alpha,trans> | 1432 |
| 50.633 | 0.47  | Bisabolene <beta>         | 1507 |

29.) Mandarin

| RT     | Area% | Component                    | RI   |
|--------|-------|------------------------------|------|
| 12.536 | 0.82  | Thujene <alpha>              | 925  |
| 12.963 | 2.19  | Pinene <alpha>               | 932  |
| 15.19  | 0.25  | Sabinene                     | 971  |
| 15.51  | 1.25  | Pinene <beta>                | 977  |
| 16.132 | 1.65  | Myrcene                      | 988  |
| 16.999 | 0.15  | n-Octanal                    | 1003 |
| 17.231 | 0.05  | Phellandrene <alpha>         | 1006 |
| 17.904 | 0.23  | Terpinene <alpha>            | 1016 |
| 18.401 | 0.47  | Cymene <para>                | 1024 |
| 18.773 | 70.07 | Limonene                     | 1029 |
| 18.852 | 0.17  | Phellandrene <beta>          | 1031 |
| 20.636 | 20.16 | Terpinene <gamma>            | 1057 |
| 22.449 | 0.75  | Terpinolene                  | 1085 |
| 23.407 | 0.13  | Linalool                     | 1099 |
| 23.521 | 0.06  | Sabinene hydrate <trans>     | 1101 |
| 29.061 | 0.05  | Terpinen-4-ol                | 1180 |
| 30.064 | 0.22  | Terpineol <alpha>            | 1194 |
| 30.834 | 0.1   | n-Decanal                    | 1205 |
| 33.133 | 0.06  | Ascaridole <Z>               | 1239 |
| 36.521 | 0.08  | Thymol                       | 1288 |
| 37.562 | 0.08  | Ascaridole <E>               | 1303 |
| 44.177 | 0.55  | Methyl anthranilate <methyl> | 1404 |
| 45.109 | 0.11  | Caryophyllene <E>            | 1418 |
| 50.373 | 0.13  | Farnesene <E,E,alpha>        | 1502 |
| 64.361 | 0.22  | Sinensal <alpha>             | 1747 |

## 30.) Myrrh

| RT     | Area% | Component               | RI   |
|--------|-------|-------------------------|------|
| 19.765 | 0.21  | Ocimene <E,beta>        | 1044 |
| 39.588 | 0.89  | Elemene <delta>         | 1334 |
| 42.668 | 0.11  | Elemene <beta,cis>      | 1381 |
| 42.788 | 0.31  | Bourbonene <alpha>      | 1382 |
| 43.15  | 5.66  | Elemene <beta,trans>    | 1388 |
| 45.074 | 0.74  | Caryophyllene <E>       | 1418 |
| 45.686 | 2.17  | Elemene <gamma>         | 1428 |
| 47.351 | 0.16  | Humulene <alpha>        | 1454 |
| 48.938 | 1.16  | Germacrene D            | 1479 |
| 49.437 | 0.42  | Selinene <beta>         | 1487 |
| 49.736 | 32.48 | Curzerene               | 1492 |
| 49.87  | 0.5   | Selinene <alpha>        | 1494 |
| 50.136 | 0.15  | Bisabolene <alpha>      | 1499 |
| 50.897 | 0.28  | Amorphene <delta>       | 1511 |
| 51.199 | 0.14  | Cadinene <delta>        | 1516 |
| 52.988 | 0.21  | Elemol <alpha>          | 1546 |
| 53.644 | 2.38  | Germacrene B            | 1557 |
| 54.654 | 0.54  | Furanodiene             | 1574 |
| 55.924 | 0.12  | Elemenone <trans,beta>  | 1596 |
| 57.526 | 29.11 | Furanoedesma-1,3-diene  | 1624 |
| 57.656 | 0.26  | Spathulenol             | 1626 |
| 58.016 | 9.61  | Lindestrene             | 1632 |
| 58.455 | 0.97  | Cadinol <epi,alpha>     | 1640 |
| 59.505 | 0.25  | Atractylone             | 1659 |
| 59.888 | 1.18  | Intermedeol             | 1665 |
| 60.727 | 0.83  | 2-Methoxyfuranodiene A  | 1680 |
| 61.315 | 0.65  | Germacrone              | 1691 |
| 62.376 | 7.43  | 2-Methoxyfuranodiene B  | 1710 |
| 71.132 | 0.88  | Furanodiene <2-acetoxy> | 1876 |
| 75.565 | 0.2   | Furanoedesmadiene       | 1966 |

## 31.) Cilantro (1)

| RT     | Area % | Component                    | RI   |
|--------|--------|------------------------------|------|
| 6.458  | 0.01   | Methyl-alpha-methyl butyrate | 931  |
| 12.411 | 0.03   | Tricyclene                   | 947  |
| 12.559 | 0.04   | Thujene <alpha>              | 987  |
| 12.994 | 5.59   | Pinene <alpha>               | 1026 |
| 13.924 | 0.89   | Camphene                     | 1027 |
| 15.216 | 0.22   | Sabinene                     | 1029 |
| 15.535 | 0.42   | Pinene <beta>                | 1097 |
| 16.158 | 0.89   | Myrcene                      | 1166 |
| 17.932 | 0.04   | Terpinene <alpha>            | 1169 |
| 18.422 | 0.99   | Cymene <para>                | 1192 |
| 18.733 | 2.09   | Limonene                     | 1224 |
| 18.843 | 0.1    | Phellandrene <beta>          | 1291 |
| 18.947 | 0.05   | 1,8-cineole                  | 1365 |
| 20.649 | 3.64   | Terpinene <gamma>            | 1373 |
| 21.474 | 0.18   | Linalool oxide <cis>         | 1387 |
| 22.479 | 0.49   | Terpinolene                  | 1401 |
| 22.571 | 0.1    | Linalool oxide <trans>       | 1427 |
| 23.642 | 73.89  | Linalool                     | 1452 |
| 23.754 | 0.08   | Hotrienol                    | 1457 |
| 26.806 | 4.52   | Camphor                      | 1480 |
| 27.093 | 0.04   | Citronellal                  | 1495 |
| 28.51  | 0.13   | Borneol                      | 1497 |
| 29.099 | 0.11   | Terpinen-4-ol                | 1504 |
| 30.104 | 0.29   | Terpineol <alpha>            | 1507 |
| 32.238 | 0.03   | Citronellol                  | 1510 |
| 33.86  | 1.37   | Geraniol                     | 1517 |
| 38.818 | 0.1    | Myrtenyl acetate             | 1523 |
| 41.141 | 0.03   | Neryl acetate                | 1526 |
| 42.441 | 3.59   | Geranyl acetate              | 1560 |
| 45.152 | 0.05   | Caryophyllene <E>            | 1614 |



## 32.) Cilantro (2)

| RT     | Area% | Component           | RI   |
|--------|-------|---------------------|------|
| 9.132  | 0.12  | Hexenol <3Z>        | 850  |
| 9.529  | 0.18  | Hexenol <2E>        | 860  |
| 11.152 | 0.83  | n-Nonane            | 900  |
| 12.979 | 2.76  | Pinene <alpha>      | 932  |
| 13.916 | 0.4   | Camphene            | 949  |
| 15.526 | 0.15  | Pinene <beta>       | 977  |
| 16.15  | 0.28  | Myrcene             | 988  |
| 17.016 | 0.63  | n-Octanal           | 1003 |
| 18.413 | 0.62  | Cymene <para>       | 1024 |
| 18.719 | 0.79  | Limonene            | 1029 |
| 20.633 | 3.86  | Terpinene <gamma>   | 1057 |
| 22.47  | 0.16  | Terpinolene         | 1085 |
| 23.476 | 31.55 | Linalool            | 1100 |
| 26.767 | 1.97  | Camphor             | 1147 |
| 30.24  | 0.41  | Decenal <4E>        | 1197 |
| 30.868 | 9.88  | n-Decanal           | 1206 |
| 33.729 | 0.38  | Decenal <2Z>        | 1247 |
| 33.846 | 0.95  | Geraniol            | 1249 |
| 34.729 | 20.31 | Decenal <2E>        | 1262 |
| 35.121 | 10.79 | Decen-1-ol <2E>     | 1268 |
| 35.382 | 2.83  | n-Decanol           | 1271 |
| 37.817 | 0.49  | Undecanal           | 1307 |
| 41.538 | 1.24  | Undecenal <2E>      | 1364 |
| 41.84  | 0.22  | Undecenol <2E>      | 1368 |
| 42.417 | 0.41  | Geranyl acetate     | 1377 |
| 44.49  | 1.04  | Dodecanal           | 1409 |
| 48.098 | 4.36  | Dodecenal <2E>      | 1466 |
| 48.303 | 0.3   | Dodecen-1-ol <2E>   | 1469 |
| 56.874 | 0.29  | Tetradecanal        | 1612 |
| 60.212 | 1.8   | Tetradeceneol <10E> | 1671 |

### 33.) Cypress

| RT     | Area% | Component                   | RI   |
|--------|-------|-----------------------------|------|
| 12.378 | 0.13  | Tricyclene                  | 922  |
| 12.526 | 0.67  | Thujene <alpha>             | 924  |
| 12.979 | 46.7  | Pinene <alpha>              | 932  |
| 13.786 | 0.65  | Fenchene <alpha>            | 947  |
| 13.886 | 0.17  | Camphene                    | 948  |
| 15.178 | 1.87  | Sabinene                    | 971  |
| 15.494 | 0.86  | Pinene <beta>               | 977  |
| 16.119 | 2.32  | Myrcene                     | 988  |
| 17.384 | 21.2  | Carene <delta-3>            | 1009 |
| 17.889 | 0.42  | Terpinene <alpha>           | 1016 |
| 18.375 | 0.66  | Cymene <para>               | 1023 |
| 18.686 | 2.14  | Limonene                    | 1028 |
| 18.798 | 0.33  | Phellandrene <beta>         | 1030 |
| 20.594 | 0.79  | Terpinene <gamma>           | 1057 |
| 22.432 | 2.55  | Terpinolene                 | 1084 |
| 23.389 | 1.01  | Linalool                    | 1099 |
| 27.305 | 0.76  | Karahanaenone               | 1155 |
| 29.043 | 1.95  | Terpinen-4-ol               | 1180 |
| 30.045 | 0.68  | Terpineol <alpha>           | 1194 |
| 36.861 | 0.62  | Terpinen-4-ol acetate       | 1293 |
| 39.431 | 0.45  | Terpinyl acetate            | 1332 |
| 40.316 | 5.58  | Terpinyl acetate <alpha>    | 1345 |
| 44.836 | 1.01  | Funebreene <beta>           | 1414 |
| 45.088 | 0.23  | Caryophyllene <E>           | 1418 |
| 45.381 | 0.16  | Cedrene <beta>              | 1423 |
| 47.347 | 0.25  | Humulene <alpha>            | 1454 |
| 48.547 | 0.2   | Cadina-1(6),4-diene <trans> | 1473 |
| 48.936 | 1.5   | Germacrene D                | 1479 |
| 51.195 | 0.56  | Cadinene <delta>            | 1516 |
| 56.579 | 3.58  | Cedrol                      | 1607 |

## 34.) White Tumeric

| RT     | Area % | Component               | RI   |
|--------|--------|-------------------------|------|
| 12.97  | 1.83   | Pinene <alpha>          | 932  |
| 13.908 | 0.34   | Camphene                | 949  |
| 15.199 | 0.25   | Sabinene                | 972  |
| 15.521 | 2.93   | Pinene <beta>           | 977  |
| 16.14  | 0.22   | Myrcene                 | 988  |
| 18.721 | 2      | Limonene                | 1029 |
| 18.964 | 49.45  | 1,8-cineole             | 1032 |
| 23.422 | 3.16   | Linalool                | 1099 |
| 28.481 | 0.24   | Borneol                 | 1172 |
| 29.072 | 0.75   | Terpinen-4-ol           | 1180 |
| 29.813 | 1.54   | Methyl salicylate       | 1191 |
| 30.079 | 1.61   | Terpineol <alpha>       | 1194 |
| 45.122 | 0.7    | Caryophyllene <E>       | 1419 |
| 47.188 | 2.13   | Farnesene <E,beta>      | 1452 |
| 47.384 | 0.6    | Humulene <alpha>        | 1455 |
| 47.656 | 0.27   | Alloaromadendrene       | 1459 |
| 49.87  | 0.28   | Cubebol <epi>           | 1494 |
| 50.045 | 0.49   | Murolene <alpha>        | 1497 |
| 50.932 | 0.87   | Amorphene <delta>       | 1512 |
| 51.235 | 2.77   | Cadinene <delta>        | 1517 |
| 53.029 | 6.06   | Elemol                  | 1547 |
| 53.772 | 0.79   | Nerolidol <E>           | 1559 |
| 54.718 | 0.58   | Germacrene-D-4-ol       | 1575 |
| 57.401 | 0.83   | Eudesmol <10-epi,gamma> | 1621 |
| 57.69  | 0.31   | Cubenol <epi>           | 1627 |
| 57.924 | 1.81   | Eudesmol <gamma>        | 1631 |
| 58.492 | 1.42   | Murolol <alpha>         | 1641 |
| 58.604 | 2.81   | Murrolol <epi,alpha>    | 1643 |
| 58.754 | 0.7    | Cadinol <delta>         | 1645 |
| 59.253 | 12.26  | Cadinol <alpha>         | 1654 |

## 35.) Sotigrass

| RT     | Area % | Component                              | RI   |
|--------|--------|----------------------------------------|------|
| 6.255  | 0.1    | Toluene                                | 779  |
| 12.925 | 0.14   | Pinene <alpha>                         | 932  |
| 13.855 | 0.2    | Camphene                               | 949  |
| 15.045 | 1.39   | 3,7,7-trimethyl-1,3,5-Cycloheptatriene | 970  |
| 16.08  | 0.62   | Myrcene                                | 988  |
| 16.195 | 0.25   | 1,8-cineole <dehydro>                  | 990  |
| 16.705 | 48.29  | Carene <delta-2>                       | 1000 |
| 17.18  | 0.74   | Phellandrene <alpha>                   | 1006 |
| 17.855 | 0.27   | Terpinene <alpha>                      | 1016 |
| 18.34  | 0.37   | Cymene <para>                          | 1024 |
| 18.63  | 3.32   | Limonene                               | 1028 |
| 18.77  | 1.27   | Phellandrene <beta>                    | 1030 |
| 19.05  | 0.26   | Ocimene <Z,beta>                       | 1034 |
| 25.075 | 2.29   | Menth-2-en-1-ol <cis,para>             | 1124 |
| 26.32  | 1.38   | Menth-2-en-1ol <trans,para>            | 1142 |
| 28.355 | 0.99   | Mentha-1,5-dien-8-ol <para>            | 1171 |
| 29.415 | 0.33   | Cymen-8-ol <para>                      | 1186 |
| 30.005 | 0.73   | Terpineol <alpha>                      | 1194 |
| 30.135 | 0.62   | Piperitol <cis>                        | 1196 |
| 30.965 | 0.6    | Piperitol <trans>                      | 1208 |
| 33.565 | 0.31   | Car-3-en-2-one                         | 1246 |
| 34.01  | 32.37  | Piperitone                             | 1254 |
| 41.06  | 0.17   | Neryl acetate                          | 1357 |
| 44.395 | 0.18   | Decyl acetate                          | 1408 |
| 45.04  | 1.01   | Caryophyllene <E>                      | 1419 |
| 45.755 | 0.18   | Gurjunene <beta>                       | 1430 |
| 49.405 | 0.54   | Dihydroagarofuran                      | 1488 |
| 51.16  | 0.37   | Cadinene <delta>                       | 1517 |
| 51.855 | 0.23   | Kessane                                | 1528 |
| 54.97  | 0.48   | Caryophyllene oxide                    | 1581 |

## 36.) Palmarosa

| RT     | Area% | Component                  | RI   |
|--------|-------|----------------------------|------|
| 15.83  | 0.04  | Hept-5-en-2-one <6-methyl> | 983  |
| 16.137 | 0.12  | Myrcene                    | 988  |
| 18.706 | 0.12  | Limonene                   | 1028 |
| 18.926 | 0.04  | 1,8-cineole                | 1032 |
| 19.103 | 0.28  | Ocimene <Z,beta>           | 1034 |
| 19.803 | 1.15  | Ocimene <E,beta>           | 1045 |
| 23.419 | 1.6   | Linalool                   | 1099 |
| 28.87  | 0.07  | Menthol                    | 1177 |
| 32.064 | 0.08  | Nerol                      | 1223 |
| 32.22  | 0.08  | Citronellol                | 1225 |
| 33.009 | 0.55  | Neral                      | 1237 |
| 33.989 | 79.78 | Geraniol                   | 1251 |
| 35.051 | 1.17  | Geranial                   | 1267 |
| 37.11  | 0.32  | Geranyl formate            | 1297 |
| 42.419 | 11.33 | Geranyl acetate            | 1377 |
| 43.176 | 0.06  | Elemene <beta>             | 1388 |
| 45.125 | 1.16  | Caryophyllene <E>          | 1419 |
| 47.381 | 0.08  | Humulene <alpha>           | 1455 |
| 51.179 | 0.06  | Sesquiterpenoid            | 1516 |
| 53.459 | 0.12  | Geranyl butanoate          | 1554 |
| 53.768 | 0.08  | Nerolidol <E>              | 1559 |
| 55.045 | 0.29  | Caryophyllene oxide        | 1581 |
| 59.173 | 0.09  | Ageratochromene            | 1653 |
| 62.534 | 0.51  | Farnesol <2E,6Z>           | 1713 |
| 64.389 | 0.6   | Geranyl heptanoate         | 1747 |
| 68.782 | 0.05  | Farnesyl acetate           | 1830 |
| 74.416 | 0.09  | Geranyl octanoate          | 1942 |

## 37.) Citronella

| RT     | Area% | Component                   | RI   |
|--------|-------|-----------------------------|------|
| 13.125 | 0.09  | Pinene <alpha>              | 933  |
| 16.314 | 0.08  | Myrcene                     | 989  |
| 18.899 | 3.76  | Limonene                    | 1029 |
| 23.617 | 0.67  | Linalool                    | 1100 |
| 27.041 | 0.69  | Isopulegol                  | 1149 |
| 27.337 | 40.76 | Citronellal                 | 1153 |
| 31.051 | 0.11  | n-Decanal                   | 1206 |
| 32.27  | 0.1   | Nerol                       | 1224 |
| 32.45  | 11.16 | Citronellol                 | 1227 |
| 33.22  | 0.36  | Neral                       | 1238 |
| 34.112 | 26.28 | Geraniol                    | 1251 |
| 35.247 | 0.55  | Geranial                    | 1267 |
| 40.029 | 0.1   | Citridiol A                 | 1339 |
| 40.744 | 1.93  | Citronellyl acetate         | 1349 |
| 40.825 | 0.47  | Eugenol                     | 1351 |
| 42.616 | 2.28  | Geranyl acetate             | 1378 |
| 43.038 | 0.1   | Bourbonene <alpha>          | 1384 |
| 43.394 | 1.39  | Elemene <beta>              | 1390 |
| 45.342 | 0.24  | Caryophyllene <trans>       | 1420 |
| 48.798 | 0.1   | Cadina-1(6),4-diene <trans> | 1475 |
| 49.194 | 1.88  | Germacrene D                | 1481 |
| 50.259 | 0.31  | Muurolene <alpha>           | 1498 |
| 51.149 | 0.76  | Amorphene <delta>           | 1513 |
| 51.449 | 1.32  | Cadinene <delta>            | 1518 |
| 53.244 | 2.31  | Elemol <alpha>              | 1548 |
| 54.939 | 1.16  | Germacrene D-4-ol           | 1577 |
| 58.707 | 0.16  | Muurolol <alpha>            | 1642 |
| 58.815 | 0.2   | Murrolol <epi,alpha>        | 1644 |
| 59.463 | 0.68  | Cadinol <alpha>             | 1655 |

## 38.) Cardamom

| RT     | Area% | Component                               | RI   |
|--------|-------|-----------------------------------------|------|
| 12.539 | 0.24  | Thujene <alpha>                         | 925  |
| 12.967 | 1.7   | Pinene <alpha>                          | 932  |
| 15.198 | 4.52  | Sabinene                                | 972  |
| 15.515 | 0.39  | Pinene <beta>                           | 977  |
| 16.138 | 2.16  | Myrcene                                 | 988  |
| 17.005 | 0.11  | n-Octanal                               | 1003 |
| 17.91  | 0.08  | Terpinene <alpha>                       | 1016 |
| 18.401 | 0.26  | Cymene <para>                           | 1024 |
| 18.714 | 2.54  | Limonene                                | 1029 |
| 18.942 | 35.46 | 1,8-cineole                             | 1032 |
| 20.618 | 0.2   | Terpinene <gamma>                       | 1057 |
| 21.43  | 0.57  | Sabinene hydrate <cis>                  | 1069 |
| 22.457 | 0.07  | Terpinolene                             | 1085 |
| 23.421 | 3.65  | Linalool                                | 1099 |
| 23.532 | 0.27  | Sabinene hydrate <trans>                | 1101 |
| 24.359 | 0.06  | 2-Methyl-6-methylen-octa-1,7-dien-3-one | 1113 |
| 28.347 | 0.08  | Terpineol <delta>                       | 1170 |
| 29.075 | 0.74  | Terpinen-4-ol                           | 1180 |
| 30.081 | 1.75  | Terpineol <alpha>                       | 1194 |
| 31.129 | 0.09  | Octyl acetate                           | 1210 |
| 31.55  | 0.38  | Sabinene hydrate acetate <cis>          | 1216 |
| 33.011 | 0.16  | Neral                                   | 1237 |
| 33.82  | 5.51  | Linalyl acetate                         | 1249 |
| 35.041 | 0.25  | Geranial                                | 1267 |
| 38.148 | 0.12  | Terpinyl acetate <delta>                | 1312 |
| 38.665 | 0.07  | Methyl geranate                         | 1320 |
| 40.387 | 37.29 | Terpinyl acetate <alpha>                | 1346 |
| 42.411 | 0.62  | Geranyl acetate                         | 1377 |
| 49.479 | 0.09  | Selinene <beta>                         | 1488 |
| 53.777 | 0.57  | Nerolidol <E>                           | 1560 |

## 39.) Pitanga

| RT     | Area% | Component                   | RI   |
|--------|-------|-----------------------------|------|
| 40.532 | 0.74  | Cubebene <alpha>            | 1346 |
| 42.437 | 8.17  | Copaene <alpha>             | 1375 |
| 43.318 | 2.59  | Elemene <beta>              | 1388 |
| 45.279 | 13.97 | Caryophyllene <trans>       | 1419 |
| 45.855 | 1.06  | Elemene <gamma>             | 1428 |
| 47.523 | 2.18  | Humulene <alpha>            | 1455 |
| 47.794 | 2.65  | Alloaromadendrene           | 1459 |
| 48.545 | 1.33  | Cadina-1(6),4-diene <cis>   | 1471 |
| 48.726 | 3.85  | Cadina-1(6),4-diene <trans> | 1474 |
| 49.115 | 2.16  | Germacrene D                | 1480 |
| 49.448 | 1.71  | Guaiene <cis,beta>          | 1485 |
| 49.729 | 3.06  | Viridiflorene               | 1490 |
| 50.014 | 2.32  | Bicyclogermacrene           | 1494 |
| 50.187 | 3.97  | Muurolene <alpha>           | 1497 |
| 50.63  | 0.59  | Guaiene <trans,beta>        | 1504 |
| 51.396 | 14.22 | Cadinene <delta>            | 1517 |
| 51.587 | 4.18  | Calamenene <trans>          | 1520 |
| 51.669 | 1.65  | Zonarene                    | 1522 |
| 52.231 | 0.64  | Cadine-1,4-diene <trans>    | 1531 |
| 53.821 | 1.49  | Germacrene B                | 1558 |
| 54.871 | 3.05  | Spathulenol                 | 1576 |
| 55.196 | 2.07  | Caryophyllene oxide         | 1581 |
| 55.419 | 4.02  | Globulol                    | 1585 |
| 55.922 | 1.96  | Viridiflorol                | 1593 |
| 56.053 | 1.44  | Cubeban-11-ol               | 1595 |
| 56.656 | 1.05  | Rosifoliol                  | 1606 |
| 57.845 | 4.96  | Cubenol <epi>               | 1627 |
| 58.707 | 5.24  | Cubenol                     | 1642 |
| 58.903 | 1.35  | Cadinol <delta>             | 1645 |
| 59.395 | 2.33  | Cadinol <alpha>             | 1654 |



## 40.) Galbanum Resin

| RT     | Area % | Component                  | RI   |
|--------|--------|----------------------------|------|
| 11.315 | 0.67   | Thujene <alpha>            | 923  |
| 11.71  | 5.96   | Pinene <alpha>             | 931  |
| 12.58  | 0.13   | Camphene                   | 948  |
| 13.825 | 0.78   | Sabinene                   | 971  |
| 14.185 | 77.18  | Pinene <beta>              | 978  |
| 14.736 | 3.21   | Myrcene                    | 988  |
| 15.893 | 1.48   | 3-Carene                   | 1006 |
| 16.88  | 0.65   | Cymene <para>              | 1021 |
| 17.164 | 1.7    | Limonene                   | 1026 |
| 17.264 | 0.48   | Phellandrene <beta>        | 1027 |
| 17.575 | 0.53   | Ocimene <Z,beta>           | 1032 |
| 24.503 | 0.59   | Pinocarveol <trans>        | 1137 |
| 25.982 | 0.19   | Pinocarpone                | 1159 |
| 28.27  | 0.8    | Myrtenal                   | 1193 |
| 29.765 | 0.47   | Fenchyl acetate <endo>     | 1215 |
| 31.201 | 0.55   | Thymol, methyl ether       | 1236 |
| 31.637 | 0.63   | 3-methyl-2-butenyl tiglate | 1242 |
| 34.288 | 0.15   | Bornyl acetate             | 1282 |
| 38.409 | 0.74   | Terpinyl acetate <alpha>   | 1345 |
| 39.852 | 0.14   | Ylangene <alpha>           | 1367 |
| 40.273 | 0.25   | Copaene <alpha>            | 1373 |
| 45.138 | 0.13   | Brasila-1(6),5(10)-diene   | 1451 |
| 47.01  | 0.3    | Himachalene <gamma>        | 1481 |
| 48.375 | 0.27   | Dihydroagarofuran <beta>   | 1503 |
| 51.718 | 0.27   | Muurol-5-en-4-a-ol <Z>     | 1560 |
| 52.957 | 0.26   | Juneol <10-epi>            | 1581 |
| 53.81  | 0.45   | Guaiol                     | 1596 |
| 55.26  | 0.25   | Eudesmol <10-epi,gamma>    | 1621 |
| 57.685 | 0.79   | Bulnesol                   | 1664 |

## 41.) Fennel

| RT     | Area % | Component                 | RI   |
|--------|--------|---------------------------|------|
| 6.295  | 0.01   | Cyclohexene <3-methylene> | 779  |
| 12.415 | 0.02   | Tricyclene                | 922  |
| 12.562 | 0.02   | Thujene <alpha>           | 925  |
| 12.993 | 4.44   | Pinene <alpha>            | 932  |
| 13.826 | 0.04   | Fenchene <alpha>          | 947  |
| 13.928 | 0.46   | Camphene                  | 949  |
| 15.221 | 0.23   | Sabinene                  | 971  |
| 15.539 | 0.23   | Pinene <beta>             | 977  |
| 16.164 | 1.71   | Myrcene                   | 988  |
| 17.264 | 0.57   | Phellandrene <alpha>      | 1006 |
| 17.937 | 0.02   | Terpinene <alpha>         | 1016 |
| 18.425 | 0.14   | Cymene <para>             | 1024 |
| 18.737 | 2.99   | Limonene                  | 1028 |
| 18.848 | 0.6    | Phellandrene <beta>       | 1030 |
| 18.954 | 0.15   | 1,8-cineole               | 1032 |
| 19.126 | 0.05   | Ocimene <Z,beta>          | 1034 |
| 20.646 | 1.07   | Terpinene <gamma>         | 1057 |
| 21.465 | 0.16   | Sabinene hydrate <cis>    | 1069 |
| 22.491 | 0.23   | Terpinolene               | 1085 |
| 22.785 | 25.53  | Fenchone                  | 1089 |
| 24.831 | 0.03   | Fenchol <endo>            | 1119 |
| 25.313 | 0.08   | Pinene hydrate <trans>    | 1126 |
| 26.787 | 0.54   | Camphor                   | 1147 |
| 29.106 | 0.02   | Terpinen-4-ol             | 1180 |
| 30.307 | 3.3    | Methyl chavicol           | 1197 |
| 34.05  | 0.11   | Anethole <Z>              | 1252 |
| 34.149 | 0.11   | Anis aldehyde <para>      | 1253 |
| 36.476 | 57.06  | Anethole <E>              | 1287 |
| 42.478 | 0.05   | 2-Methoxyphenylacetone    | 1377 |
| 49.007 | 0.03   | Germacrene D              | 1480 |

#### 42.) Wintergreen

| RT     | Area% | Component            | RI   |
|--------|-------|----------------------|------|
| 12.966 | 0.05  | Pinene <alpha>       | 932  |
| 13.905 | 0.01  | Camphene             | 948  |
| 15.291 | 0     | Phenol               | 973  |
| 15.515 | 0.01  | Pinene <beta>        | 977  |
| 17.232 | 0     | Phellandrene <alpha> | 1006 |
| 18.399 | 0.01  | Cymene <ortho>       | 1023 |
| 18.704 | 0     | Limonene             | 1028 |
| 18.933 | 0.01  | Benzyl alcohol       | 1031 |
| 21.45  | 0.01  | Octanol              | 1069 |
| 23.42  | 0.05  | Linalool             | 1099 |
| 28.315 | 0.01  | Ethyl benzoate       | 1169 |
| 30.112 | 99.65 | Methyl salicylate    | 1194 |
| 33.842 | 0.02  | Geraniol             | 1249 |
| 35.066 | 0.16  | Ethyl salicylate     | 1266 |
| 45.138 | 0.01  | Caryophyllene <E>    | 1419 |

## 43.) Zdravetz

| RT     | Area% | Component             | RI   |
|--------|-------|-----------------------|------|
| 17.896 | 0.37  | Terpinene <alpha>     | 1016 |
| 18.386 | 0.91  | Cymene <para>         | 1024 |
| 18.693 | 0.29  | Limonene              | 1028 |
| 19.788 | 0.55  | Ocimene <E,beta>      | 1045 |
| 20.605 | 3.43  | Terpinene <gamma>     | 1057 |
| 22.442 | 0.57  | Terpinolene           | 1084 |
| 23.404 | 0.79  | Linalool              | 1099 |
| 29.062 | 0.44  | Terpinen-4-ol         | 1180 |
| 43.179 | 0.97  | Elemene <beta>        | 1388 |
| 45.72  | 5.55  | Elemene <gamma>       | 1428 |
| 49.471 | 0.35  | Selinene <beta>       | 1488 |
| 50.486 | 0.98  | Farnesene <E,E,alpha> | 1504 |
| 52.096 | 0.53  | Zonarene              | 1531 |
| 52.371 | 1.35  | Eremophilene          | 1536 |
| 52.643 | 1.45  | Selina-3,7(11)-diene  | 1541 |
| 52.826 | 0.76  | Occidentalol          | 1544 |
| 53.685 | 10.06 | Germacrene B          | 1558 |
| 55.966 | 8.01  | Elemenone <cis,beta>  | 1596 |
| 57.51  | 0.49  | Eremoligenol          | 1623 |
| 57.927 | 1.51  | Eudesmol <gamma>      | 1631 |
| 59.265 | 6.87  | Eudesmol <alpha>      | 1654 |
| 59.742 | 2.1   | Germacrone A          | 1663 |
| 60.944 | 3.02  | Bisabolol <epi,alpha> | 1684 |
| 61.403 | 40.08 | Germacrone            | 1692 |
| 61.645 | 1.06  | Eudesm-7(11)-en-4-ol  | 1696 |
| 63.337 | 4.05  | Germacrone B          | 1728 |

## 44.) Ginger Lily (1)

| RT     | Area % | Component                                           | RI   |
|--------|--------|-----------------------------------------------------|------|
| 21.733 | 6.2    | Linalool                                            | 1097 |
| 25.971 | 3.94   | Benzyl acetate                                      | 1159 |
| 31.986 | 1.84   | Geraniol                                            | 1248 |
| 37.921 | 2.88   | Anthanilate methyl                                  | 1337 |
| 39.286 | 1.21   | Jasmine Sesquiterpene A                             | 1358 |
| 40.835 | 1.94   | Methyl cinnamate <E>                                | 1382 |
| 41.355 | 5.56   | Jasmone <cis>                                       | 1390 |
| 42.435 | 1.13   | Jasmine sesquiterpene B                             | 1407 |
| 43.038 | 2.08   | Caryophyllene <trans>                               | 1417 |
| 43.379 | 1      | Gurjunene <beta>                                    | 1422 |
| 44.123 | 2.06   | Guaiene <alpha>                                     | 1434 |
| 44.554 | 0.91   | p-Methoxypropiophenone                              | 1441 |
| 44.788 | 1.17   | Amorpha-4,11-diene                                  | 1445 |
| 44.965 | 7.12   | Clovene <alpha>                                     | 1448 |
| 45.511 | 1.1    | Rotundene                                           | 1456 |
| 46.331 | 1.86   | Gurjunene <gamma>                                   | 1470 |
| 46.734 | 1.88   | Curcumene <gamma>                                   | 1476 |
| 47.484 | 1.77   | Alaskene <beta>                                     | 1488 |
| 48.15  | 4.1    | Bisabolene <alpha>                                  | 1500 |
| 48.579 | 2.71   | Bisabolene <beta>                                   | 1507 |
| 48.732 | 8.45   | 2,6,10,10-Tetramethylbicyclo[7.2.0]undeca-2,6-diene | 1509 |
| 49.69  | 3.65   | Bisabolene <E,gamma>                                | 1526 |
| 49.924 | 1.39   | Nerolidol <cis>                                     | 1530 |
| 50.55  | 16.49  | Bisabolene <trans,alpha>                            | 1540 |
| 51.76  | 2.61   | Nerolidol <E>                                       | 1560 |
| 52.35  | 10.92  | Hexenyl Benzoate <3Z>                               | 1570 |
| 63.193 | 2.45   | Benzyl benzoate                                     | 1766 |

## 45.) Ginger Lily (2)

| RT     | Area % | Component                                           | RI   |
|--------|--------|-----------------------------------------------------|------|
| 23.431 | 13.02  | Linalool                                            | 1099 |
| 27.745 | 7.23   | Benzyl acetate                                      | 1161 |
| 33.835 | 3.11   | Geraniol                                            | 1249 |
| 39.868 | 4.94   | Anthranilate <methyl>                               | 1338 |
| 40.626 | 2.07   | Eugenol                                             | 1350 |
| 41.288 | 1.09   | Jasmine Sesquiterpene A                             | 1360 |
| 42.786 | 2.9    | Methyl cinnamate <E>                                | 1382 |
| 43.33  | 8.37   | Jasmone <Z>                                         | 1391 |
| 45.129 | 3.17   | Caryophyllene <trans>                               | 1419 |
| 45.993 | 0.89   | Jasmine Sesquiterpene C                             | 1433 |
| 46.954 | 1.36   | Clovene <alpha>                                     | 1448 |
| 48.768 | 2.04   | Curcumene <gamma>                                   | 1477 |
| 48.959 | 0.99   | Curcumene                                           | 1480 |
| 49.259 | 0.83   | Himachalene <gamma>                                 | 1485 |
| 50.169 | 2.19   | Bisabolene <Z,alpha>                                | 1499 |
| 50.616 | 2.06   | Bisabolene <beta>                                   | 1506 |
| 50.771 | 5.4    | 2,6,10,10-Tetramethylbicyclo[7.2.0]undeca-2,6-diene | 1509 |
| 51.751 | 2.12   | Bisabolene <E,gamma>                                | 1526 |
| 51.932 | 2.36   | Nerolidol <cis>                                     | 1529 |
| 52.571 | 10.16  | Bisabolene <trans,alpha>                            | 1539 |
| 53.782 | 4.34   | Nerolidol <E>                                       | 1560 |
| 54.381 | 12.82  | Hexenyl Benzoate <3Z>                               | 1570 |
| 58.83  | 2.31   | Methyl dihydrojasmonate <cis>                       | 1647 |
| 65.31  | 1.82   | Benzyl benzoate                                     | 1764 |

## 46.) Helichrysum

| RT     | Area % | Component                           | RI   |
|--------|--------|-------------------------------------|------|
| 8.483  | 0.15   | Hexan-3-one <4-methyl>              | 834  |
| 12.974 | 26.85  | Pinene <alpha>                      | 932  |
| 13.788 | 0.19   | Fenchene <alpha>                    | 947  |
| 15.498 | 0.22   | Pinene <beta>                       | 977  |
| 18.689 | 2.17   | Limonene                            | 1028 |
| 18.901 | 0.17   | 1,8-cineole                         | 1031 |
| 19.987 | 0.38   | Isobutyl angelate                   | 1048 |
| 20.596 | 0.21   | Terpinene <gamma>                   | 1057 |
| 23.391 | 0.42   | Linalool                            | 1099 |
| 26.949 | 1.35   | Isoamyl tiglate                     | 1150 |
| 29.062 | 0.71   | 2,2,5,5-tetramethyl-3,4-hexanedione | 1180 |
| 30.048 | 0.22   | Terpineol <alpha>                   | 1194 |
| 32.028 | 0.33   | Nerol                               | 1223 |
| 36.091 | 0.54   | Hexyl angelate                      | 1282 |
| 41.088 | 5.01   | Neryl acetate                       | 1357 |
| 41.822 | 0.44   | Ylangene <alpha>                    | 1368 |
| 42.271 | 1.45   | Copaene <alpha>                     | 1375 |
| 44.198 | 6.52   | Italicene                           | 1404 |
| 44.672 | 0.83   | Bergamotene <alpha,cis>             | 1411 |
| 45.097 | 5.48   | Caryophyllene <E>                   | 1418 |
| 46.834 | 0.59   | Neryl propanoate                    | 1446 |
| 47.868 | 0.46   | Acoradiene <beta>                   | 1462 |
| 48.757 | 27.62  | Curcumene <gamma>                   | 1477 |
| 48.936 | 4.07   | Curcumene                           | 1479 |
| 49.137 | 0.5    | Neryl isobutanoate                  | 1483 |
| 49.456 | 7.49   | Selinene <beta>                     | 1488 |
| 49.885 | 3.63   | Selinene <alpha>                    | 1495 |
| 50.015 | 0.22   | Murolene <alpha>                    | 1497 |
| 50.682 | 0.72   | Curcumene <beta>                    | 1508 |
| 50.907 | 0.43   | Amorphene <delta>                   | 1511 |
| 51.202 | 0.63   | Cadinene <delta>                    | 1516 |

## 47.) Ghandi Root

| RT     | Area % | Component              | RI   |
|--------|--------|------------------------|------|
| 12.574 | 0.41   | Thujene <alpha>        | 925  |
| 15.233 | 1.74   | Sabinene               | 972  |
| 16.172 | 0.43   | Myrcene                | 989  |
| 17.425 | 1.45   | 3-Carene <delta>       | 1009 |
| 17.949 | 1.39   | Terpinene <alpha>      | 1017 |
| 18.439 | 2.17   | Cymene <para>          | 1024 |
| 18.746 | 1.01   | Limonene               | 1029 |
| 18.858 | 0.39   | Phellandrene <beta>    | 1031 |
| 20.659 | 2.62   | Terpinene <gamma>      | 1058 |
| 21.491 | 0.49   | Linalool oxide <cis>   | 1070 |
| 22.498 | 0.7    | Terpinolene            | 1085 |
| 22.59  | 0.35   | Linalool oxide <trans> | 1087 |
| 23.546 | 60.13  | Linalool               | 1101 |
| 23.714 | 0.61   | Hotrienol              | 1103 |
| 29.131 | 11.18  | Terpinen-4-ol          | 1181 |
| 30.119 | 2      | Terpineol <alpha>      | 1195 |
| 32.097 | 0.45   | Nerol                  | 1224 |
| 33.867 | 0.55   | Geraniol               | 1249 |
| 47.424 | 0.28   | Humulene <alpha>       | 1455 |
| 49.942 | 0.51   | Selinene <alpha>       | 1495 |
| 50.082 | 0.28   | Muurolene <alpha>      | 1498 |
| 50.971 | 0.47   | Amorphene <delta>      | 1512 |
| 51.272 | 2      | Cadinene <delta>       | 1517 |
| 54.757 | 1.42   | Spathulenol            | 1576 |
| 57.153 | 0.4    | Selina-6-en-4-ol       | 1617 |
| 58.52  | 0.33   | Muurolol <alpha>       | 1641 |
| 58.636 | 1.12   | Murrolol <epi,alpha>   | 1643 |
| 59.285 | 2.65   | Cadinol <alpha>        | 1655 |
| 61.324 | 2.13   | Sesquiterpene alchol   | 1691 |
| 62.756 | 0.34   | Eudesma-4,11-dien-2-ol | 1717 |



## 48.) Hyssop

| RT     | Area % | Component              | RI   |
|--------|--------|------------------------|------|
| 11.295 | 0.22   | Thujene <alpha>        | 923  |
| 11.683 | 0.76   | Pinene <alpha>         | 930  |
| 13.791 | 1.85   | Sabinene               | 971  |
| 14.09  | 10.75  | Pinene <beta>          | 976  |
| 14.71  | 1.82   | Myrcene                | 987  |
| 16.858 | 0.12   | Cymene <para>          | 1021 |
| 17.144 | 3.62   | Limonene               | 1026 |
| 17.245 | 3.75   | Phellandrene <beta>    | 1027 |
| 17.33  | 0.33   | 1,8-cineole            | 1028 |
| 18.21  | 0.56   | Ocimene <E,beta>       | 1042 |
| 21.729 | 0.7    | Linalool               | 1097 |
| 22.179 | 0.2    | Thujone <alpha>        | 1103 |
| 22.943 | 0.13   | Thujone <beta>         | 1115 |
| 25.861 | 13.18  | Pinocamphone <trans>   | 1157 |
| 25.975 | 0.2    | Pinocarvone            | 1159 |
| 27.006 | 45.87  | Pinocamphone <cis>     | 1174 |
| 27.227 | 0.26   | Terpinen-4-ol          | 1177 |
| 28.259 | 2.22   | Myrtenol               | 1193 |
| 36.835 | 0.4    | Myrtenyl acetate <cis> | 1320 |
| 40.759 | 1.09   | Bourbonene <alpha>     | 1380 |
| 42.254 | 0.31   | Gurjunene <alpha>      | 1404 |
| 43.035 | 0.87   | Caryophyllene <trans>  | 1417 |
| 45.546 | 1.36   | (-)-Alloaromadendrene  | 1457 |
| 46.875 | 2.45   | Germacrene D           | 1478 |
| 47.763 | 2.04   | Bicyclogermacrene      | 1493 |
| 48.841 | 0.23   | Amorphene <delta>      | 1511 |
| 50.949 | 1.62   | Elemol <alpha>         | 1547 |
| 52.589 | 0.96   | Spathulenol            | 1574 |
| 55.801 | 0.24   | Eudesmol <gamma>       | 1631 |

## 49.) Star Anise

| RT     | Area% | Component                 | RI   |
|--------|-------|---------------------------|------|
| 12.927 | 0.47  | Pinene <alpha>            | 931  |
| 15.151 | 0.03  | Sabinene                  | 971  |
| 15.469 | 0.04  | Pinene <beta>             | 976  |
| 16.091 | 0.08  | Myrcene                   | 987  |
| 17.19  | 0.25  | Phellandrene <alpha>      | 1006 |
| 17.337 | 0.24  | 3-Carene <delta>          | 1008 |
| 17.861 | 0.06  | Terpinene <alpha>         | 1016 |
| 18.351 | 0.07  | Cymene <para>             | 1023 |
| 18.658 | 1.39  | Limonene                  | 1028 |
| 18.769 | 0.27  | Phellandrene <beta>       | 1029 |
| 18.867 | 0.21  | 1,8-cineole               | 1031 |
| 20.565 | 0.07  | Terpinene <gamma>         | 1056 |
| 22.403 | 0.05  | Terpinolene               | 1084 |
| 23.358 | 0.9   | Linalool                  | 1098 |
| 29.007 | 0.14  | Terpinen-4-ol             | 1179 |
| 30.012 | 0.12  | Terpineol <alpha>         | 1193 |
| 30.212 | 3.01  | Methyl chavicol           | 1196 |
| 33.956 | 0.19  | Anethole <Z>              | 1251 |
| 34.056 | 0.3   | Anis aldehyde <para>      | 1252 |
| 36.395 | 90.7  | Anethole <E>              | 1286 |
| 42.225 | 0.05  | Copaene <alpha>           | 1374 |
| 42.541 | 0.07  | Anisyl methyl ketone      | 1379 |
| 44.636 | 0.04  | Bergamotene <alpha,cis>   | 1411 |
| 45.054 | 0.22  | Caryophyllene <E>         | 1418 |
| 45.888 | 0.25  | Bergamotene <alpha,trans> | 1431 |
| 50.308 | 0.02  | Farnesene <E,E,alpha>     | 1501 |
| 50.536 | 0.04  | Bisabolene <beta>         | 1505 |
| 53.696 | 0.03  | Nerolidol <E>             | 1558 |
| 54.23  | 0.04  | Anethole hydrate          | 1567 |
| 60.362 | 0.65  | Foeniculin                | 1674 |

## 50.) Juniper

| RT     | Area% | Component                   | RI   |
|--------|-------|-----------------------------|------|
| 12.539 | 2.25  | Thujene <alpha>             | 925  |
| 13.01  | 33.35 | Pinene <alpha>              | 933  |
| 13.897 | 0.21  | Camphene                    | 949  |
| 15.218 | 16.39 | Sabinene                    | 972  |
| 15.515 | 2.43  | Pinene <beta>               | 977  |
| 16.161 | 14.62 | Myrcene                     | 989  |
| 17.231 | 0.15  | Phellandrene <alpha>        | 1006 |
| 17.904 | 1.3   | Terpinene <alpha>           | 1016 |
| 18.395 | 1.43  | Cymene <para>               | 1024 |
| 18.713 | 5.72  | Limonene                    | 1029 |
| 18.818 | 0.65  | Phellandrene <beta>         | 1030 |
| 20.614 | 2.53  | Terpinene <gamma>           | 1057 |
| 22.45  | 1.52  | Terpinolene                 | 1085 |
| 29.076 | 3.99  | Terpinen-4-ol               | 1180 |
| 30.066 | 0.26  | Terpineol <alpha>           | 1194 |
| 40.388 | 0.4   | Cubebene <alpha>            | 1346 |
| 42.282 | 0.18  | Copaene <alpha>             | 1375 |
| 43.169 | 1.16  | Elemene <beta>              | 1388 |
| 45.113 | 1.4   | Caryophyllene <E>           | 1419 |
| 45.708 | 0.75  | Elemene <gamma>             | 1428 |
| 47.178 | 0.32  | Farnesene <E,beta>          | 1451 |
| 47.371 | 1.14  | Humulene <alpha>            | 1454 |
| 48.574 | 0.27  | Cadina-1(6),4-diene <trans> | 1474 |
| 48.969 | 3.9   | Germacrene D                | 1480 |
| 49.87  | 0.38  | Bicyclogermacrene           | 1494 |
| 50.032 | 0.27  | Muurolene <alpha>           | 1497 |
| 50.918 | 0.41  | Amorphene <delta>           | 1512 |
| 51.222 | 1.07  | Cadinene <delta>            | 1517 |
| 53.667 | 1.36  | Germacrene B                | 1558 |
| 54.702 | 0.19  | Spathulenol                 | 1575 |

## 51.) White Kunzea

| RT     | Area% | Component                | RI   |
|--------|-------|--------------------------|------|
| 6.954  | 0.17  | 2,4-dimethyl-3-pentanone | 796  |
| 12.613 | 0.15  | Thujene <alpha>          | 926  |
| 13.079 | 41.62 | Pinene <alpha>           | 934  |
| 15.274 | 0.47  | Sabinene                 | 973  |
| 15.594 | 0.66  | Pinene <beta>            | 979  |
| 16.215 | 0.26  | Myrcene                  | 989  |
| 17.993 | 0.15  | Terpinene <alpha>        | 1018 |
| 18.485 | 0.47  | Cymene <para>            | 1025 |
| 18.796 | 1.06  | Limonene                 | 1030 |
| 19.027 | 16.94 | 1,8-cineole              | 1033 |
| 19.885 | 0.41  | Ocimene <E,beta>         | 1046 |
| 20.702 | 0.31  | Terpinene <gamma>        | 1058 |
| 23.508 | 1.05  | Linalool                 | 1100 |
| 23.97  | 0.3   | Isopentyl isovalerate    | 1107 |
| 25.404 | 0.2   | Campholenal <alpha>      | 1128 |
| 29.166 | 0.54  | Terpinen-4-ol            | 1181 |
| 30.173 | 1.79  | Terpineol <alpha>        | 1196 |
| 32.304 | 1.11  | Citronellol              | 1227 |
| 44.431 | 0.39  | Gurjunene <alpha>        | 1408 |
| 45.22  | 0.47  | Caryophyllene <E>        | 1420 |
| 47.753 | 0.88  | Alloaromadendrene        | 1461 |
| 49.684 | 2.54  | Viridiflorene            | 1491 |
| 49.97  | 3.53  | Bicyclogermacrene        | 1496 |
| 51.328 | 0.66  | Cadinene <delta>         | 1518 |
| 51.528 | 1.17  | Calamenene <trans>       | 1522 |
| 54.455 | 0.47  | Palustrol                | 1571 |
| 54.819 | 0.39  | Spathulenol              | 1577 |
| 55.368 | 2.47  | Globulol                 | 1586 |
| 55.909 | 17.31 | Viridiflorol             | 1595 |
| 56.475 | 2.06  | Ledol                    | 1605 |

## 52.) Kanuka

| RT     | Area% | Component                | RI   |
|--------|-------|--------------------------|------|
| 6.901  | 0.3   | 2,4-dimethyl-3-pentanone | 794  |
| 10.007 | 0.2   | Isopentyl acetate        | 872  |
| 12.537 | 1.64  | Thujene <alpha>          | 925  |
| 13.006 | 66.28 | Pinene <alpha>           | 933  |
| 15.507 | 0.62  | Pinene <beta>            | 977  |
| 17.902 | 0.14  | Terpinene <alpha>        | 1016 |
| 18.397 | 5.49  | Cymene <para>            | 1024 |
| 18.7   | 1.45  | Limonene                 | 1028 |
| 18.916 | 2.59  | 1,8-cineole              | 1032 |
| 19.793 | 0.42  | Ocimene <E,beta>         | 1045 |
| 20.446 | 0.25  | Pentyl isobutanoate      | 1054 |
| 20.617 | 7.13  | Terpinene <gamma>        | 1057 |
| 22.449 | 1.39  | Terpinolene              | 1085 |
| 23.409 | 1.88  | Linalool                 | 1099 |
| 23.873 | 0.3   | Isopentyl isovalerate    | 1106 |
| 25.308 | 0.28  | Campholenal <alpha>      | 1126 |
| 26.291 | 0.23  | Pinocarveol <trans>      | 1140 |
| 29.062 | 0.27  | Terpinen-4-ol            | 1180 |
| 30.067 | 0.56  | Terpineol <alpha>        | 1194 |
| 47.641 | 0.2   | Alloaromadendrene        | 1459 |
| 49.564 | 0.27  | Viridiflorene            | 1489 |
| 49.856 | 0.5   | Bicyclogermacrene        | 1494 |
| 51.219 | 0.25  | Cadinene <delta>         | 1517 |
| 51.417 | 0.79  | Calamenene <trans>       | 1520 |
| 52.076 | 0.33  | Cadina-1,4-diene <trans> | 1531 |
| 53.765 | 1.71  | Nerolidol <E>            | 1559 |
| 54.347 | 0.23  | Palustrol                | 1569 |
| 54.707 | 0.56  | Spathulenol              | 1575 |
| 55.763 | 2.91  | Viridiflorol             | 1593 |
| 56.36  | 0.83  | Ledol                    | 1603 |

## 53.) Laurel Leaf

| RT     | Area% | Component                | RI   |
|--------|-------|--------------------------|------|
| 12.526 | 0.59  | Thujene <alpha>          | 924  |
| 12.956 | 5.89  | Pinene <alpha>           | 932  |
| 13.889 | 0.53  | Camphene                 | 948  |
| 15.187 | 7.16  | Sabinene                 | 971  |
| 15.503 | 4.41  | Pinene <beta>            | 977  |
| 16.121 | 0.75  | Myrcene                  | 988  |
| 17.221 | 0.2   | Phellandrene <alpha>     | 1006 |
| 17.37  | 0.21  | Carene <delta-3>         | 1008 |
| 17.893 | 0.69  | Terpinene <alpha>        | 1016 |
| 18.386 | 0.62  | Cymene <para>            | 1024 |
| 18.703 | 1.62  | Limonene                 | 1028 |
| 18.82  | 0.59  | Phellandrene <beta>      | 1030 |
| 18.954 | 47.72 | 1,8-cineole              | 1032 |
| 19.783 | 0.23  | Ocimene <E,beta>         | 1045 |
| 20.6   | 1.24  | Terpinene <gamma>        | 1057 |
| 21.411 | 0.13  | Sabinene hydrate <cis>   | 1069 |
| 22.436 | 0.31  | Terpinolene              | 1084 |
| 23.408 | 4.79  | Linalool                 | 1099 |
| 28.323 | 0.23  | Terpineol <delta>        | 1169 |
| 28.457 | 0.21  | Borneol                  | 1171 |
| 29.054 | 2.93  | Terpinen-4-ol            | 1180 |
| 30.055 | 1.95  | Terpineol <alpha>        | 1194 |
| 36.187 | 0.3   | Bornyl acetate           | 1283 |
| 38.118 | 0.52  | Terpinyl acetate <delta> | 1312 |
| 40.339 | 10.51 | Terpinyl acetate <alpha> | 1345 |
| 40.602 | 0.77  | Eugenol                  | 1349 |
| 43.154 | 0.29  | Elemene <beta>           | 1388 |
| 43.781 | 3.88  | Methyleugenol            | 1397 |
| 45.099 | 0.58  | Caryophyllene <trans>    | 1418 |
| 55.019 | 0.15  | Caryophyllene oxide      | 1580 |

## 54.) Lavandin

| RT     | Area% | Component              | RI   |
|--------|-------|------------------------|------|
| 12.913 | 0.38  | Pinene <alpha>         | 931  |
| 13.847 | 0.25  | Camphene               | 948  |
| 15.46  | 0.47  | Octen-3-ol             | 976  |
| 16.074 | 0.44  | Myrcene                | 987  |
| 17.468 | 0.15  | Hexyl acetate          | 1010 |
| 18.64  | 0.65  | Limonene               | 1027 |
| 18.852 | 5.35  | 1,8-cineole            | 1031 |
| 19.032 | 0.91  | Ocimene <Z,beta>       | 1033 |
| 19.733 | 0.24  | Ocimene <E,beta>       | 1044 |
| 21.359 | 0.34  | Sabinene hydrate <cis> | 1068 |
| 22.381 | 0.16  | Terpinolene            | 1083 |
| 23.393 | 34.4  | Linalool               | 1099 |
| 23.861 | 0.27  | Octen-3-yl acetate     | 1105 |
| 26.682 | 7.42  | Camphor                | 1146 |
| 27.775 | 0.55  | Lavandulol             | 1161 |
| 28.406 | 2.99  | Borneol                | 1170 |
| 28.998 | 3.79  | Terpinen-4-ol          | 1179 |
| 29.749 | 0.46  | Hexyl butanoate        | 1190 |
| 29.998 | 0.73  | Terpineol <alpha>      | 1193 |
| 33.233 | 0.17  | Hexyl isovalerate      | 1240 |
| 33.773 | 33.09 | Linalyl acetate        | 1248 |
| 36.047 | 2.56  | Lavandulyl acetate     | 1281 |
| 39.135 | 0.16  | Hexyl tiglate          | 1327 |
| 42.331 | 0.18  | Geranyl acetate        | 1375 |
| 45.048 | 1.65  | Caryophyllene <E>      | 1418 |
| 47.113 | 1.25  | Farnesene <E,beta>     | 1450 |
| 48.898 | 0.59  | Germacrene D           | 1479 |
| 50.164 | 0.25  | Lavandulyl isovalerate | 1499 |
| 60.853 | 0.15  | Bisabolol <alpha>      | 1682 |

## 55.) May Chang

| RT     | Area % | Component                  | RI   |
|--------|--------|----------------------------|------|
| 11.826 | 1.39   | Pinene <alpha>             | 933  |
| 12.706 | 0.34   | Camphene                   | 950  |
| 13.946 | 0.58   | Sabinene                   | 974  |
| 14.238 | 0.98   | Pinene <beta>              | 979  |
| 14.627 | 1.12   | Hept-5-en-2-one <6-methyl> | 986  |
| 14.871 | 1.31   | Myrcene                    | 990  |
| 17.316 | 13.31  | Limonene                   | 1028 |
| 17.505 | 1.56   | 1,8-cineole                | 1031 |
| 21.906 | 1.19   | Linalool                   | 1099 |
| 25.485 | 1.51   | Citronellal                | 1152 |
| 26.115 | 0.56   | Chrysanthenol <cis>        | 1161 |
| 26.814 | 0.16   | Borneol                    | 1171 |
| 27.41  | 1.39   | Isocitral <E>              | 1180 |
| 28.428 | 0.61   | Terpineol <alpha>          | 1195 |
| 30.431 | 0.29   | Nerol                      | 1225 |
| 30.615 | 0.21   | Citronellol                | 1227 |
| 31.373 | 30.55  | Neral                      | 1239 |
| 32.195 | 0.75   | Geraniol                   | 1251 |
| 33.404 | 40.23  | Geranial                   | 1269 |
| 41.354 | 0.19   | Elemene <beta>             | 1390 |
| 43.236 | 1.46   | Caryophyllene <trans>      | 1420 |
| 45.481 | 0.19   | Humulene <alpha>           | 1456 |
| 53.08  | 0.12   | Caryophyllene oxide        | 1583 |



## 56.) Blue Chamomile

| RT     | Area% | Component                     | RI   |
|--------|-------|-------------------------------|------|
| 12.956 | 0.08  | Pinene <alpha>                | 932  |
| 18.388 | 0.15  | Cymene <para>                 | 1024 |
| 19.089 | 0.13  | Ocimene <Z,beta>              | 1034 |
| 19.789 | 0.85  | Ocimene <E,beta>              | 1045 |
| 20.55  | 0.41  | Artemisia ketone              | 1056 |
| 20.605 | 0.19  | Terpinene <gamma>             | 1057 |
| 39.39  | 0.12  | Elemene <delta>               | 1331 |
| 43.112 | 0.63  | Isocomene <alpha>             | 1387 |
| 45.105 | 0.51  | Caryophyllene <E>             | 1418 |
| 47.216 | 60.22 | Farnesene <E,beta>            | 1452 |
| 47.708 | 0.18  | Ageratochromene <6-demethoxy> | 1460 |
| 48.964 | 3     | Germacrene D                  | 1480 |
| 49.529 | 1.07  | Farnesene                     | 1489 |
| 49.853 | 2.42  | Bicyclogermacrene             | 1494 |
| 50.376 | 8.44  | Farnesene <E,E,alpha>         | 1502 |
| 50.598 | 0.16  | Bisabolene <beta>             | 1506 |
| 51.214 | 0.12  | Cadinene <delta>              | 1517 |
| 53.739 | 0.17  | Nerolidol <E>                 | 1559 |
| 54.234 | 0.17  | Dendrolasin                   | 1567 |
| 54.698 | 0.43  | Spathulenol                   | 1575 |
| 57.555 | 0.11  | Bisabolendienol               | 1624 |
| 59.171 | 2.78  | Bisabolol oxide B <alpha>     | 1653 |
| 60.669 | 1.95  | Bisabolone oxide A <alpha>    | 1679 |
| 60.908 | 0.71  | Bisabolol <alpha>             | 1683 |
| 63.277 | 0.42  | Chamazulene                   | 1726 |
| 64.343 | 11.42 | Bisabolol oxide A <alpha>     | 1746 |
| 69.241 | 0.21  | Phytone                       | 1839 |
| 71.11  | 2.58  | Spiroether <Z>                | 1876 |
| 71.826 | 0.19  | Spiroether <E>                | 1890 |

## 57.) Cajeput

| RT     | Area % | Component                | RI   |
|--------|--------|--------------------------|------|
| 6.85   | 0.06   | 2,4-dimethyl-3-pentanone | 794  |
| 12.445 | 0.26   | Thujene <alpha>          | 924  |
| 12.85  | 4.15   | Pinene <alpha>           | 932  |
| 15.4   | 1.49   | Pinene <beta>            | 976  |
| 16.025 | 0.59   | Myrcene                  | 987  |
| 17.145 | 0.18   | Phellandrene <alpha>     | 1006 |
| 17.285 | 0.17   | Carene <delta-3>         | 1008 |
| 17.805 | 0.25   | Terpinene <alpha>        | 1016 |
| 18.28  | 1.53   | Cymene <para>            | 1023 |
| 18.58  | 6.31   | Limonene                 | 1028 |
| 18.78  | 66.31  | 1,8-cineole              | 1032 |
| 20.49  | 2.12   | Terpinene <gamma>        | 1056 |
| 22.335 | 0.76   | Terpinolene              | 1084 |
| 23.3   | 0.3    | Linalool                 | 1098 |
| 28.24  | 0.1    | Terpineol <delta>        | 1169 |
| 28.945 | 0.54   | Terpinen-4-ol            | 1179 |
| 29.93  | 6.57   | Terpineol <alpha>        | 1194 |
| 40.205 | 1.05   | Terpinyl acetate <alpha> | 1345 |
| 41.75  | 0.17   | Ylangene <alpha>         | 1368 |
| 43.065 | 0.15   | Elemene <beta,trans>     | 1388 |
| 44.965 | 2.79   | Caryophyllene <E>        | 1418 |
| 47.235 | 1.33   | Humulene <alpha>         | 1454 |
| 48.37  | 0.12   | Gurjunene <gamma>        | 1471 |
| 48.58  | 0.26   | Himachalene <gamma>      | 1475 |
| 48.73  | 0.29   | Amorphene <alpha>        | 1477 |
| 49.225 | 0.19   | Selinene <delta>         | 1485 |
| 49.345 | 0.94   | Selinene <beta>          | 1487 |
| 49.755 | 0.8    | Aciphyllene              | 1494 |
| 54.93  | 0.1    | Caryophyllene oxide      | 1580 |
| 55.65  | 0.12   | Viridiflorol             | 1592 |

## 58.) Myrtle

| RT     | Area % | Component                        | RI   |
|--------|--------|----------------------------------|------|
| 6.924  | 0.15   | 2,4-dimethyl-3-pentanone         | 795  |
| 11.856 | 0.93   | Isobutyl isobutyrate             | 913  |
| 12.566 | 0.3    | Thujene <alpha>                  | 925  |
| 13.01  | 22.47  | Pinene <alpha>                   | 933  |
| 15.542 | 0.28   | Pinene <beta>                    | 978  |
| 16.165 | 0.28   | Myrcene                          | 989  |
| 16.242 | 0.19   | Linalool oxide <dehydroxy,trans> | 990  |
| 17.176 | 0.12   | Linalool oxide <dehydroxy,cis>   | 1005 |
| 17.264 | 0.14   | Phellandrene <alpha>             | 1007 |
| 17.415 | 0.49   | Carene <delta-3>                 | 1009 |
| 18.432 | 1.51   | Cymene <para>                    | 1024 |
| 18.756 | 12.14  | Limonene                         | 1029 |
| 18.988 | 35     | 1,8-cineole                      | 1033 |
| 19.829 | 0.36   | Ocimene <E,beta>                 | 1045 |
| 20.647 | 0.42   | Terpinene <gamma>                | 1057 |
| 22.484 | 0.32   | Terpinolene                      | 1085 |
| 23.464 | 7.92   | Linalool                         | 1100 |
| 23.68  | 0.13   | Hotrienol                        | 1103 |
| 29.102 | 0.23   | Terpinen-4-ol                    | 1180 |
| 30.113 | 2.59   | Terpineol <alpha>                | 1195 |
| 30.296 | 0.27   | Methyl chavicol                  | 1198 |
| 33.846 | 1.18   | Linalyl acetate                  | 1249 |
| 38.836 | 7.92   | Myrtenyl acetate                 | 1323 |
| 40.378 | 0.64   | Terpinyl acetate <alpha>         | 1346 |
| 41.146 | 0.09   | Neryl acetate                    | 1358 |
| 42.44  | 2.28   | Geranyl acetate                  | 1377 |
| 43.827 | 0.45   | Methyleugenol                    | 1398 |
| 45.156 | 0.41   | Caryophyllene <E>                | 1419 |
| 47.417 | 0.69   | Humulene <alpha>                 | 1455 |
| 50.977 | 0.1    | Dihydroquinone                   | 1513 |

## 59.) Spikenard

| RT     | Area% | Component                       | RI   |
|--------|-------|---------------------------------|------|
| 12.931 | 2.88  | Pinene <alpha>                  | 932  |
| 15.476 | 5.12  | Pinene <beta>                   | 976  |
| 36.896 | 1.04  | Methyl myrtenate                | 1293 |
| 42.84  | 3.78  | Patchoulene <beta>              | 1383 |
| 44.547 | 1.33  | Gurjunene <alpha>               | 1409 |
| 45.011 | 1.02  | Aristolene                      | 1417 |
| 45.546 | 0.84  | Aromadendrene dehydro           | 1425 |
| 45.773 | 9.94  | Gurjunene <beta>                | 1429 |
| 46.057 | 1.79  | Guaiene <alpha>                 | 1434 |
| 46.136 | 1.35  | Vatirenene <beta>               | 1435 |
| 46.448 | 12.92 | 6,9-guaiadiene                  | 1440 |
| 46.944 | 4.7   | Seychellene                     | 1448 |
| 47.148 | 8.03  | Velerana-7,11-diene             | 1451 |
| 47.6   | 0.86  | Alloaromadendrene               | 1458 |
| 47.709 | 2.78  | Patchoulene <alpha>             | 1460 |
| 47.903 | 2.18  | Caryophyllene <9-epi>           | 1463 |
| 49.13  | 2.09  | Muurola-4(14),5-diene <trans>   | 1483 |
| 49.422 | 1.07  | Selinene <beta>                 | 1487 |
| 49.635 | 4.62  | Valencene                       | 1491 |
| 49.885 | 1.48  | Guaine <E,beta>                 | 1495 |
| 51.296 | 10.44 | Nordosina7,9,11-triene <E>      | 1518 |
| 55.006 | 3.2   | Nardol                          | 1580 |
| 56.214 | 1.68  | Carotol                         | 1600 |
| 59.659 | 1.95  | 1(10)-Aristolen-9-beta-ol       | 1661 |
| 60.098 | 1.1   | Patchouli alcohol               | 1669 |
| 60.262 | 4.81  | Jatamansone                     | 1672 |
| 65.631 | 0.74  | 9-Hydroxyaristol-1(10)-en-2-one | 1770 |

## 60.) Blue Lotus

| RT      | Area % | Component               | RI   |
|---------|--------|-------------------------|------|
| 18.715  | 0.13   | Limonene                | 1029 |
| 18.936  | 0.69   | 1,8-cineole             | 1032 |
| 23.047  | 0.23   | Methyl benzoate         | 1093 |
| 28.63   | 16.72  | Methyl benzeneacetate   | 1174 |
| 40.628  | 0.14   | Eugenol                 | 1350 |
| 41.53   | 0.36   | Clovene <alpha>         | 1363 |
| 41.866  | 0.12   | Ylangene <alpha>        | 1368 |
| 43.395  | 0.63   | Blue Lotus              | 1392 |
| 44.175  | 1.28   | Caryophyllene <cis>     | 1404 |
| 44.574  | 0.73   | Isocaryophyllene        | 1410 |
| 44.87   | 0.39   | Caryophyllene <trans>   | 1415 |
| 45.136  | 65.56  | Caryophyllene <gamma>   | 1419 |
| 45.654  | 2.22   | Ylangene <beta>         | 1427 |
| 45.759  | 0.65   | Elemene <gamma>         | 1429 |
| 46.996  | 0.87   | Spirolepechinene        | 1449 |
| 47.387  | 0.97   | Humulene <alpha>        | 1455 |
| 55.05   | 1.87   | Caryophyllene oxide     | 1581 |
| 60.152  | 0.38   | Patchouli alcohol       | 1670 |
| 76.915  | 0.57   | Olealdehyde             | 1993 |
| 83.012  | 0.26   | Linoleic acid <Z>       | 2124 |
| 83.334  | 2.22   | Oleic Acid              | 2132 |
| 88.911  | 0.82   | Eicos-9-en-1-ol <Z>     | 2259 |
| 92.011  | 0.57   | Eicos-11-enoic acid <Z> | 2332 |
| 95.954  | 0.44   | Docosanal               | 2429 |
| 97.284  | 0.71   | Docos-13-en-1-ol <cis>  | 2463 |
| 108.201 | 0.47   | Benzyl Alkanoate        | 2755 |

## 61.) Basil

| RT     | Area % | Component                       | RI   |
|--------|--------|---------------------------------|------|
| 5.66   | 0.02   | Toluene                         | 782  |
| 17.45  | 0.02   | 1,8-cineole                     | 1030 |
| 19.89  | 0.15   | Linalool oxide <cis>            | 1069 |
| 20.947 | 0.18   | Linalool oxide <trans>          | 1085 |
| 21.858 | 24.99  | Linalool                        | 1099 |
| 25.145 | 0.04   | Isopulegol                      | 1147 |
| 25.656 | 0.11   | Menthone                        | 1154 |
| 26.606 | 0.13   | Rosefuran epoxide               | 1168 |
| 27.135 | 0.64   | Menthol                         | 1176 |
| 27.375 | 0.11   | Citronella                      | 1180 |
| 28.361 | 0.15   | Terpineol <alpha>               | 1194 |
| 28.633 | 72.4   | Methyl chavicol                 | 1198 |
| 29.482 | 0.05   | Octyl acetate                   | 1211 |
| 31.311 | 0.08   | Neral                           | 1238 |
| 33.335 | 0.09   | Geranial                        | 1267 |
| 37.503 | 0.02   | Elemene <delta>                 | 1331 |
| 40.368 | 0.02   | Copaene <alpha>                 | 1374 |
| 43.144 | 0.1    | Caryophyllene <trans>           | 1419 |
| 44.034 | 0.2    | Bergamotene <alpha,trans>       | 1433 |
| 44.533 | 0.02   | Citronellyl propanoate          | 1441 |
| 45.39  | 0.08   | Humulene <alpha>                | 1455 |
| 47.194 | 0.02   | Farnesene                       | 1484 |
| 48.697 | 0.01   | Bisabolene <beta>               | 1509 |
| 50.638 | 0.15   | Bisabolene <trans,alpha>        | 1542 |
| 52.264 | 0.18   | Cinnamaldehyde <E,para-methoxy> | 1569 |
| 52.99  | 0.04   | Caryophyllene oxide             | 1581 |

## 62.) Tulsi

| RT     | Area % | Component                 | RI   |
|--------|--------|---------------------------|------|
| 11.695 | 0.29   | Pinene <alpha>            | 931  |
| 14.091 | 0.13   | Pinene <beta>             | 976  |
| 15.75  | 0.07   | Phellandrene <alpha>      | 1004 |
| 17.155 | 0.16   | Limonene                  | 1026 |
| 17.342 | 1.17   | 1,8-cineole               | 1029 |
| 21.74  | 0.58   | Linalool                  | 1097 |
| 26.049 | 0.27   | Isoborneol                | 1160 |
| 28.457 | 0.29   | Methyl chavicol           | 1195 |
| 30.406 | 0.95   | Citronellol               | 1224 |
| 32.004 | 1.93   | Geraniol                  | 1248 |
| 38.407 | 0.23   | Cubebene <alpha>          | 1344 |
| 38.848 | 44.45  | Eugenol                   | 1351 |
| 40.274 | 0.81   | Copaene <alpha>           | 1373 |
| 42.117 | 0.12   | Caryophyllene <cis>       | 1402 |
| 42.51  | 0.09   | Isocaryophyllene          | 1408 |
| 43.114 | 37.62  | Caryophyllene <trans>     | 1418 |
| 45.31  | 6.49   | Humulene <alpha>          | 1453 |
| 46.341 | 0.07   | Cadina-1(6),4-diene <cis> | 1470 |
| 46.892 | 0.09   | Germacrene D              | 1479 |
| 47.99  | 0.11   | Muurolene <alpha>         | 1497 |
| 48.859 | 0.14   | Amorphene <delta>         | 1512 |
| 49.174 | 0.73   | Cadinene <delta>          | 1517 |
| 49.365 | 0.07   | Calamenene <trans>        | 1520 |
| 50.961 | 1.48   | Elemol                    | 1547 |
| 52.908 | 0.8    | Caryophyllene oxide       | 1580 |
| 54.53  | 0.08   | Bisabol-11-ol <trans>     | 1608 |
| 55.804 | 0.1    | gamma-Eudesmol            | 1631 |
| 56.388 | 0.1    | Muurolol <alpha>          | 1641 |
| 56.494 | 0.12   | Murrolol <epi, alpha>     | 1643 |
| 57.131 | 0.46   | Cadinol <alpha>           | 1655 |

## 63.) Osmanthus

| RT      | Area % | Component                    | RI   |
|---------|--------|------------------------------|------|
| 17.154  | 0.32   | n-Octanal                    | 1003 |
| 17.233  | 0.42   | Hexenyl acetate              | 1004 |
| 21.648  | 10.33  | Linalool oxide <cis>         | 1070 |
| 22.731  | 8.95   | Linalool oxide <trans>       | 1086 |
| 23.621  | 12.1   | Linalool                     | 1099 |
| 30.241  | 0.13   | Terpineol <alpha>            | 1194 |
| 32.243  | 3.16   | Nerol                        | 1223 |
| 32.403  | 6.09   | Citronellol                  | 1226 |
| 34.011  | 3.08   | Geraniol                     | 1249 |
| 37.367  | 1.31   | Methyl octine carbonate      | 1298 |
| 38.449  | 0.1    | Theaspirane <trans>          | 1314 |
| 41.757  | 0.17   | Phenethyl alcohol <beta>     | 1364 |
| 43.36   | 0.4    | Elemene <beta>               | 1388 |
| 44.803  | 0.22   | Ionone <dihydro,alpha>       | 1411 |
| 45.597  | 0.22   | Dihydroionene                | 1423 |
| 46.109  | 20.45  | Ionone <dihydro,beta>        | 1432 |
| 46.324  | 0.32   | Citronellyl propionate       | 1435 |
| 46.686  | 0.84   | Ionol <dihydro,beta>         | 1441 |
| 48.149  | 10.28  | Decalactone <gamma>          | 1464 |
| 48.995  | 18.72  | Ionone <trans,beta>          | 1478 |
| 49.158  | 0.25   | Epoxy-beta-Ionone            | 1480 |
| 60.662  | 0.12   | 3-Oxo-7,8-dihydro-beta-ionol | 1676 |
| 62.606  | 0.25   | 4-Oxo-7,8-dihydro-beta-ionol | 1711 |
| 75.299  | 0.23   | Palmitic acid                | 1956 |
| 77.037  | 0.15   | Palmitate <ethyl>            | 1992 |
| 83.507  | 0.66   | Linolenic acid <alpha>       | 2131 |
| 84.674  | 0.11   | Ethyl octadecanoate          | 2157 |
| 84.927  | 0.4    | Ethyl linaloate              | 2163 |
| 105.495 | 0.11   | Tetracosanol                 | 2673 |



## 64.) Geranium

| RT     | Area % | Component               | RI   |
|--------|--------|-------------------------|------|
| 12.974 | 0.3    | Pinene <alpha>          | 932  |
| 23.434 | 2.11   | Linalool                | 1099 |
| 24.158 | 1.68   | Rose oxide <cis>        | 1110 |
| 25.287 | 0.62   | Rose oxide <trans>      | 1126 |
| 27.075 | 0.15   | Citronellal             | 1151 |
| 28.009 | 5.73   | Menthone                | 1165 |
| 32.367 | 49.69  | Citronellol             | 1228 |
| 33.049 | 0.22   | Neral                   | 1238 |
| 33.882 | 6.5    | Geraniol                | 1250 |
| 34.797 | 0.27   | Myrtanol <trans>        | 1263 |
| 35.056 | 0.39   | Geranial                | 1267 |
| 35.475 | 17.86  | Citronellyl formate     | 1273 |
| 37.127 | 1.99   | Geranyl formate         | 1297 |
| 37.733 | 0.29   | Terpineol acetate       | 1306 |
| 40.546 | 0.36   | Citronellyl acetate     | 1348 |
| 42.305 | 0.25   | Copaene <alpha>         | 1375 |
| 42.418 | 0.19   | Geranyl acetate         | 1377 |
| 42.834 | 0.72   | Bourbonene <alpha>      | 1383 |
| 45.136 | 0.66   | Caryophyllene <E>       | 1419 |
| 46.372 | 0.28   | Citronellyl propanoate  | 1439 |
| 46.988 | 0.19   | Muroladiene <cis>       | 1448 |
| 47.665 | 0.23   | Alloaromadendrene       | 1459 |
| 48.985 | 1.42   | Germacrene D            | 1480 |
| 49.594 | 1.11   | Viridiflorene           | 1490 |
| 51.244 | 0.41   | Cadinene <delta>        | 1517 |
| 51.652 | 0.26   | Citronellyl butanoate   | 1524 |
| 55.071 | 1.04   | Phenyl ethyl tiglate    | 1581 |
| 57.417 | 3.81   | Eudesmol <10-epi,gamma> | 1622 |
| 59.609 | 0.66   | Citronellyl tiglate     | 1660 |
| 61.511 | 0.61   | Geranyl tiglate         | 1694 |

## 65.) Black Spruce

| RT     | Area % | Component                                | RI   |
|--------|--------|------------------------------------------|------|
| 12.367 | 0.29   | Tricyclene                               | 922  |
| 12.512 | 0.15   | Thujene <alpha>                          | 924  |
| 12.942 | 10.06  | Pinene <alpha>                           | 932  |
| 13.877 | 4.95   | Camphene                                 | 948  |
| 15.167 | 1.61   | Sabinene                                 | 971  |
| 15.488 | 7.13   | Pinene <beta>                            | 977  |
| 16.115 | 20.31  | Myrcene                                  | 988  |
| 17.207 | 0.62   | Phellandrene <alpha>                     | 1006 |
| 17.357 | 2.82   | Carene <delta-3>                         | 1008 |
| 17.88  | 0.26   | Terpinene <alpha>                        | 1016 |
| 18.369 | 0.56   | Cymene <para>                            | 1023 |
| 18.686 | 13.21  | Limonene                                 | 1028 |
| 18.797 | 13.35  | Phellandrene <beta>                      | 1030 |
| 18.892 | 1.15   | 1,8-cineole                              | 1031 |
| 20.585 | 0.4    | Terpinene <gamma>                        | 1057 |
| 22.423 | 1.76   | Terpinolene                              | 1084 |
| 23.38  | 0.11   | Linalool                                 | 1098 |
| 23.846 | 4.01   | Isopentyl isovalerate                    | 1105 |
| 24.503 | 1.61   | Methyl butanoate, 3-methyl-3-butenyl <3> | 1115 |
| 25.121 | 0.08   | Menth-2-en-1-ol <cis,p>                  | 1123 |
| 26.726 | 10.71  | Camphor                                  | 1146 |
| 27.279 | 0.16   | Terpineol <E,beta>                       | 1154 |
| 28.445 | 0.71   | Borneol                                  | 1171 |
| 29.037 | 0.5    | Terpinen-4-ol                            | 1179 |
| 30.044 | 0.17   | Terpineol <alpha>                        | 1194 |
| 32.178 | 0.3    | Citronellol                              | 1225 |
| 34.068 | 1.09   | Piperitone                               | 1252 |
| 36.177 | 1.5    | Bornyl acetate                           | 1283 |
| 40.496 | 0.26   | Citronellyl acetate                      | 1348 |
| 42.371 | 0.16   | Geranyl acetate                          | 1376 |

## 66.) Black Pepper

| RT     | Area% | Component            | RI   |
|--------|-------|----------------------|------|
| 12.533 | 0.75  | Thujene <alpha>      | 925  |
| 12.969 | 12.07 | Pinene <alpha>       | 932  |
| 13.894 | 0.26  | Camphene             | 949  |
| 15.202 | 13.62 | Sabinene             | 972  |
| 15.523 | 14.09 | Pinene <beta>        | 977  |
| 16.126 | 1.03  | Myrcene              | 988  |
| 17.23  | 0.62  | Phellandrene <alpha> | 1006 |
| 17.389 | 10.14 | Carene <delta-3>     | 1009 |
| 17.898 | 0.22  | Terpinene <alpha>    | 1016 |
| 18.388 | 0.41  | Cymene <para>        | 1024 |
| 18.717 | 14.34 | Limonene             | 1029 |
| 18.818 | 0.93  | Phellandrene <beta>  | 1030 |
| 20.602 | 0.28  | Terpinene <gamma>    | 1057 |
| 22.44  | 0.23  | Terpinolene          | 1084 |
| 23.397 | 0.22  | Linalool             | 1099 |
| 29.048 | 0.16  | Terpinen-4-ol        | 1180 |
| 39.597 | 1.11  | Elemene <delta>      | 1334 |
| 40.375 | 0.13  | Cubebene <alpha>     | 1346 |
| 42.272 | 2.1   | Copaene <alpha>      | 1375 |
| 43.057 | 0.14  | Cubebene <beta>      | 1386 |
| 43.153 | 0.2   | Elemene <beta>       | 1388 |
| 45.143 | 23.35 | Caryophyllene <E>    | 1419 |
| 47.355 | 0.74  | Humulene <alpha>     | 1454 |
| 48.939 | 0.16  | Germacrene D         | 1479 |
| 49.838 | 0.22  | Bicyclogermacrene    | 1494 |
| 50.015 | 0.27  | Muurolene <alpha>    | 1497 |
| 50.58  | 0.79  | Bisabolene <beta>    | 1506 |
| 51.202 | 0.79  | Cadinene <delta>     | 1516 |
| 55.012 | 0.47  | Caryophyllene oxide  | 1580 |
| 58.712 | 0.16  | Muurolol <alpha>     | 1645 |

## 67.) Patchouli

| RT     | Area % | Component              | RI   |
|--------|--------|------------------------|------|
| 14.079 | 0.21   | Pinene <beta>          | 976  |
| 40.799 | 1.87   | Patchoulene <beta>     | 1381 |
| 41.15  | 0.85   | Elemene <beta,trans>   | 1387 |
| 42.735 | 0.44   | Cycloseychellene       | 1412 |
| 43.032 | 2.24   | Caryophyllene <E>      | 1417 |
| 44.062 | 10.85  | Guaiene <alpha>        | 1433 |
| 44.859 | 5.42   | Seychellene            | 1446 |
| 45.282 | 0.41   | Humulene <alpha>       | 1453 |
| 45.622 | 3.85   | Patchoulene <alpha>    | 1458 |
| 45.804 | 2.44   | Caryophyllene <9-epi>  | 1461 |
| 46.551 | 0.3    | Gurjunene gamma        | 1473 |
| 47.372 | 0.29   | Selinene <beta>        | 1487 |
| 47.803 | 2.6    | Aciphyllene            | 1494 |
| 47.98  | 0.77   | Patchoulene <gamma>    | 1497 |
| 48.183 | 18.77  | Bulnesene <alpha>      | 1500 |
| 49.188 | 0.21   | Selinene <7-epi,alpha> | 1517 |
| 52.198 | 0.56   | Norpatchoulenol        | 1568 |
| 52.886 | 0.41   | Caryophyllene oxide    | 1579 |
| 53.087 | 0.43   | Spathulenol            | 1583 |
| 54.911 | 0.29   | Atlantol <beta>        | 1615 |
| 55.505 | 0.72   | Citronellyl pentanoate | 1626 |
| 57.242 | 2.98   | Pogostol               | 1656 |
| 58.006 | 41.26  | Patchouli alcohol      | 1670 |
| 58.112 | 0.23   | Himachalol             | 1672 |
| 60.349 | 0.63   | Pogostone              | 1713 |

## 68.) Tuberose

| RT     | Area % | Component                | RI   |
|--------|--------|--------------------------|------|
| 17.147 | 0.23   | Limonene                 | 1026 |
| 17.337 | 0.73   | 1,8-cineole              | 1029 |
| 17.433 | 2.81   | Benzyl Alcohol           | 1030 |
| 21.366 | 6.13   | Methyl benzoate          | 1091 |
| 21.734 | 1.47   | Linalool                 | 1097 |
| 22.547 | 6.83   | Phenyl ethyl alcohol     | 1109 |
| 26.031 | 18.36  | Benzyl acetate           | 1160 |
| 27.983 | 1.34   | Methyl salicylate        | 1189 |
| 28.24  | 3.28   | Terpineol <alpha>        | 1192 |
| 37.93  | 0.57   | Anthanilate methyl       | 1337 |
| 38.342 | 0.56   | Benzyl butanoate         | 1343 |
| 38.692 | 0.59   | Eugenol                  | 1349 |
| 39.211 | 0.62   | Nonalactone <gamma>      | 1357 |
| 40.496 | 0.46   | Geranyl acetate          | 1376 |
| 41.352 | 0.79   | Jasmone <cis>            | 1390 |
| 41.889 | 0.98   | Methyleugenol            | 1398 |
| 45.247 | 1.72   | Methyl isoeugenol <Z>    | 1452 |
| 47.161 | 0.61   | Jasmolactone <cis>       | 1483 |
| 47.327 | 3.23   | Jasmolactone <trans>     | 1486 |
| 47.878 | 13.65  | Methyl isoeugenol <E>    | 1495 |
| 48.731 | 0.32   | Sesquiterpene            | 1509 |
| 50.531 | 0.73   | Bisabolene               | 1540 |
| 52.331 | 2.74   | Hexenyl Benzoate <3E>    | 1570 |
| 60.483 | 0.51   | Farnesol <2E,6Z>         | 1716 |
| 63.264 | 18.97  | Benzyl benzoate          | 1767 |
| 67.746 | 0.66   | Phenyl-ethyl octanoate   | 1854 |
| 68.477 | 1.3    | Benzyl salicylate        | 1869 |
| 71.434 | 0.32   | Palmitate <methyl>       | 1929 |
| 79.291 | 0.56   | Methyl linoleate         | 2095 |
| 79.643 | 8.93   | Methyl octadecanoate <E> | 2103 |

## 69.) Douglas Fir

| RT     | Area % | Component                          | RI   |
|--------|--------|------------------------------------|------|
| 11.326 | 0.59   | Thujene <alpha>                    | 923  |
| 11.72  | 8.02   | Pinene <alpha>                     | 931  |
| 12.593 | 0.34   | Camphene                           | 948  |
| 13.848 | 18.37  | Sabinene                           | 972  |
| 14.147 | 22.66  | Pinene <beta>                      | 978  |
| 14.751 | 2.17   | Myrcene                            | 988  |
| 15.786 | 0.17   | Phellandrene <alpha>               | 1004 |
| 15.922 | 9.07   | 3-Carene                           | 1006 |
| 16.427 | 1.61   | Terpinene <alpha>                  | 1014 |
| 16.906 | 0.54   | Cymene <para>                      | 1022 |
| 17.19  | 2.26   | Limonene                           | 1026 |
| 17.291 | 1.48   | Phellandrene <beta>                | 1028 |
| 17.612 | 0.13   | Ocimene <Z,beta>                   | 1033 |
| 18.276 | 0.38   | Ocimene <E,beta>                   | 1043 |
| 18.68  | 0.21   | 2,29-drimethyl-cis-dioxospiroonane | 1050 |
| 19.036 | 2.96   | Terpinene <gamma>                  | 1055 |
| 20.817 | 15.79  | Terpinolene                        | 1083 |
| 21.143 | 0.13   | Cymenene <para>                    | 1088 |
| 21.785 | 0.14   | Linalool                           | 1097 |
| 25.36  | 0.31   | Citronellal                        | 1150 |
| 27.279 | 4.65   | Terpinen-4-ol                      | 1178 |
| 28.295 | 0.24   | Terpineol <alpha>                  | 1193 |
| 30.452 | 1.25   | Citronellol                        | 1225 |
| 34.335 | 0.21   | Bornyl acetate                     | 1282 |
| 38.7   | 3.7    | Citronellyl acetate                | 1349 |
| 40.564 | 1.74   | Geranyl acetate                    | 1377 |
| 41.709 | 0.1    | Ethyl decanoate                    | 1396 |
| 42.465 | 0.13   | Longifolene                        | 1408 |
| 45.363 | 0.15   | Humulene <alpha>                   | 1454 |
| 46.957 | 0.5    | Germacrene D                       | 1480 |

## 70.) Anthopogon

| RT     | Area % | Component                   | RI   |
|--------|--------|-----------------------------|------|
| 12.99  | 27.65  | Pinene <alpha>              | 933  |
| 15.54  | 14.81  | Pinene <beta>               | 978  |
| 16.162 | 2.65   | Myrcene                     | 989  |
| 18.736 | 12.86  | Limonene                    | 1029 |
| 19.129 | 7.67   | Ocimene <Z,beta>            | 1035 |
| 19.829 | 1.8    | Ocimene <E,beta>            | 1045 |
| 20.645 | 2.74   | Terpinene <gamma>           | 1057 |
| 30.113 | 0.85   | Terpineol <alpha>           | 1195 |
| 42.337 | 1.42   | Copaene <alpha>             | 1376 |
| 45.165 | 5.24   | Caryophyllene <E>           | 1419 |
| 46.342 | 0.76   | Aromadendrene               | 1438 |
| 47.23  | 1.77   | Farnesene <E,beta>          | 1452 |
| 47.42  | 0.7    | Humulene <alpha>            | 1455 |
| 47.688 | 0.74   | Alloaromadendrene           | 1460 |
| 48.446 | 1.03   | Cadina-1(6),4-diene <cis>   | 1472 |
| 48.621 | 2.24   | Cadina-1(6),4-diene <trans> | 1474 |
| 49.514 | 2.38   | Selinene <beta>             | 1489 |
| 50.084 | 2.8    | Muurolene <alpha>           | 1498 |
| 50.758 | 0.75   | Curcumene <beta>            | 1509 |
| 50.973 | 2.6    | Amorphene <delta>           | 1513 |
| 51.274 | 6.54   | Cadinene <delta>            | 1518 |

## 71.) Rhododendron

| RT     | Area% | Component                   | RI   |
|--------|-------|-----------------------------|------|
| 12.557 | 0.24  | Thujene <alpha>             | 925  |
| 13.001 | 34.53 | Pinene <alpha>              | 933  |
| 13.92  | 0.3   | Camphene                    | 949  |
| 15.539 | 14.69 | Pinene <beta>               | 978  |
| 16.153 | 1.94  | Myrcene                     | 988  |
| 18.416 | 0.35  | Cymene <para>               | 1024 |
| 18.728 | 8.28  | Limonene                    | 1029 |
| 19.12  | 4.88  | Ocimene <Z,beta>            | 1035 |
| 19.816 | 1.02  | Ocimene <E,beta>            | 1045 |
| 20.635 | 3.18  | Terpinene <gamma>           | 1057 |
| 22.471 | 0.54  | Terpinolene                 | 1085 |
| 23.432 | 0.46  | Linalool                    | 1099 |
| 30.091 | 0.57  | Terpineol <alpha>           | 1195 |
| 42.311 | 0.88  | Copaene <alpha>             | 1375 |
| 45.139 | 2.67  | Caryophyllene <E>           | 1419 |
| 47.202 | 0.67  | Farnesene <E,beta>          | 1452 |
| 47.401 | 0.43  | Humulene <alpha>            | 1455 |
| 47.669 | 0.57  | Alloaromadendrene           | 1459 |
| 48.422 | 0.95  | Cadina-1(6),4-diene <cis>   | 1471 |
| 48.598 | 1.95  | Cadina-1(6),4-diene <trans> | 1474 |
| 49.486 | 0.43  | Selinene <beta>             | 1488 |
| 49.922 | 1.09  | Selinene <alpha>            | 1495 |
| 50.063 | 2.92  | Muurolene <alpha>           | 1497 |
| 50.405 | 0.34  | Farnesene <E,E,alpha>       | 1503 |
| 50.951 | 3.43  | Amorphene <delta>           | 1512 |
| 51.258 | 10.04 | Cadinene <delta>            | 1517 |
| 51.537 | 0.35  | Zonarene                    | 1522 |
| 52.353 | 0.55  | Cadinene <alpha>            | 1536 |
| 58.61  | 0.84  | Murrolol <epi,alpha>        | 1643 |
| 59.257 | 0.91  | Cadinol <alpha>             | 1654 |



## 72.) Damask Rose

| RT     | Area % | Component              | RI   |
|--------|--------|------------------------|------|
| 12.951 | 0.19   | Pinene <alpha>         | 932  |
| 16.122 | 0.11   | Myrcene                | 988  |
| 23.406 | 0.62   | Linalool               | 1099 |
| 24.195 | 1.36   | Phenyl ethyl alcohol   | 1110 |
| 29.062 | 0.14   | Terpinen-4-ol          | 1180 |
| 30.069 | 0.17   | Terpineol <alpha>      | 1194 |
| 31.473 | 0.09   | Rhodinol               | 1215 |
| 32.078 | 9.8    | Nerol                  | 1223 |
| 32.273 | 31.85  | Citronellol            | 1226 |
| 32.425 | 0.12   | Isogeraniol            | 1228 |
| 33.014 | 0.25   | Neral                  | 1237 |
| 33.876 | 20.34  | Geraniol               | 1250 |
| 34.096 | 0.16   | 2-Phenyl ethyl acetate | 1253 |
| 35.034 | 0.45   | Geraniol               | 1266 |
| 40.617 | 0.98   | Eugenol                | 1350 |
| 42.407 | 0.34   | Geranyl acetate        | 1377 |
| 43.796 | 1.01   | Methyleugenol          | 1398 |
| 45.123 | 0.2    | Caryophyllene <E>      | 1419 |
| 46.101 | 0.12   | Guaiene <alpha>        | 1434 |
| 47.381 | 0.11   | Humulene <alpha>       | 1455 |
| 48.972 | 0.24   | Germacrene D           | 1480 |
| 50.222 | 0.22   | Pentadecane            | 1500 |
| 61.828 | 2.89   | Heptadecane            | 1700 |
| 62.547 | 0.46   | Farnesol <2E,6Z>       | 1713 |
| 70.99  | 1.26   | Nonadec-9-ene          | 1873 |
| 72.355 | 19.25  | Nonadecane             | 1900 |
| 77.227 | 2.36   | Eicosane               | 1999 |
| 81.901 | 4.47   | Heneicosane            | 2099 |
| 83.342 | 0.08   | Oleic Acid             | 2132 |
| 90.657 | 0.36   | Tricosane              | 2299 |

## 73.) Sandalwood

| RT     | Area% | Component                      | RI   |
|--------|-------|--------------------------------|------|
| 45.062 | 1.18  | Santalene <alpha>              | 1418 |
| 45.95  | 0.17  | Bergamotene <alpha,trans>      | 1432 |
| 46.838 | 1.14  | Santalene <epi,beta>           | 1446 |
| 47.598 | 1.79  | Santalene <beta>               | 1458 |
| 48.944 | 0.22  | Curcumene                      | 1480 |
| 50.707 | 0.14  | Curcumene <beta>               | 1508 |
| 51.214 | 0.42  | Teresantalic acid <alpha>      | 1517 |
| 52.67  | 0.5   | Norekasantalic acid <alpha>    | 1541 |
| 53.341 | 0.22  | Ekasantalic acid <alpha>       | 1552 |
| 59.498 | 0.17  | Santalal                       | 1658 |
| 60.008 | 0.33  | Cyclosantalal <epi>            | 1667 |
| 60.321 | 47.85 | Santalol <Z,alpha>             | 1673 |
| 60.51  | 2.42  | Santalol <E,alpha>             | 1676 |
| 61.091 | 6.6   | Bergamotol <Z,alpha,trans>     | 1687 |
| 61.502 | 0.22  | Santalol                       | 1694 |
| 61.876 | 3.55  | Santalol <Z,epi,beta>          | 1700 |
| 62.02  | 0.27  | Bergamotol <trans,alpha,trans> | 1703 |
| 62.195 | 0.52  | Santalol <E,epi,beta>          | 1706 |
| 62.595 | 23.44 | Santalol <Z,beta>              | 1714 |
| 62.976 | 1.34  | Nuciferol <Z>                  | 1721 |
| 63.162 | 0.27  | Santalol <epi,beta>            | 1724 |
| 63.419 | 0.43  | Humulene <14-hydroxy,alpha>    | 1729 |
| 63.806 | 1.53  | Santalol <E,beta>              | 1736 |
| 64.035 | 1.21  | Curcumenol                     | 1741 |
| 64.14  | 0.27  | Bergamotol                     | 1743 |
| 64.638 | 0.37  | Curcumen-12-ol <beta,Z>        | 1752 |
| 64.783 | 0.68  | Ionone <6-methyl>              | 1754 |
| 64.99  | 1.54  | Lanceol <Z>                    | 1758 |

## 74.) Winter Savory

| RT     | Area % | Component                   | RI   |
|--------|--------|-----------------------------|------|
| 12.522 | 1.39   | Thujene <alpha>             | 924  |
| 12.948 | 0.97   | Pinene <alpha>              | 932  |
| 13.883 | 0.46   | Camphene                    | 948  |
| 15.502 | 1.16   | Octen-3-ol                  | 977  |
| 16.113 | 1.86   | Myrcene                     | 988  |
| 17.214 | 0.26   | Phellandrene <alpha>        | 1006 |
| 17.886 | 2.48   | Terpinene <alpha>           | 1016 |
| 18.385 | 13.93  | Cymene <para>               | 1024 |
| 18.683 | 0.8    | Limonene                    | 1028 |
| 18.794 | 0.21   | Phellandrene <beta>         | 1030 |
| 18.894 | 0.37   | 1,8-cineole                 | 1031 |
| 19.076 | 0.14   | Ocimene <Z,beta>            | 1034 |
| 20.607 | 19.05  | Terpinene <gamma>           | 1057 |
| 21.399 | 0.71   | Sabinene hydrate <cis>      | 1069 |
| 23.384 | 2.26   | Linalool                    | 1099 |
| 23.499 | 0.21   | Sabinene hydrate <trans>    | 1100 |
| 26.72  | 0.22   | Camphor                     | 1146 |
| 28.445 | 1.47   | Borneol                     | 1171 |
| 29.038 | 0.79   | Terpinen-4-ol               | 1179 |
| 30.044 | 0.36   | Terpineol <alpha>           | 1194 |
| 33.779 | 0.3    | Linalyl acetate             | 1248 |
| 37.127 | 46.01  | Carvacrol                   | 1297 |
| 41.456 | 0.31   | Carvacryl acetate           | 1362 |
| 45.085 | 2.42   | Caryophyllene <E>           | 1418 |
| 48.538 | 0.21   | Cadina-1(6),4-diene <trans> | 1473 |
| 48.929 | 0.2    | Germacrene D                | 1479 |
| 50.57  | 0.79   | Bisabolene <beta>           | 1506 |
| 50.891 | 0.15   | Amorphene <delta>           | 1511 |
| 51.188 | 0.35   | Cadinene <delta>            | 1516 |
| 55.002 | 0.16   | Caryophyllene oxide         | 1580 |

## 75.) Tagetes

| RT     | Area% | Component             | RI   |
|--------|-------|-----------------------|------|
| 9.636  | 0.11  | Trimethylfuran        | 860  |
| 13.09  | 0.14  | Pinene <alpha>        | 932  |
| 14.033 | 0.13  | Camphene              | 949  |
| 15.332 | 0.69  | Sabinene              | 971  |
| 15.652 | 0.09  | Pinene <beta>         | 977  |
| 16.277 | 0.08  | Myrcene               | 988  |
| 17.384 | 0.27  | Phellandrene <alpha>  | 1006 |
| 18.863 | 6.03  | Limonene              | 1028 |
| 19.3   | 38.77 | Ocimene <Z,beta>      | 1035 |
| 19.958 | 0.45  | Ocimene <E,beta>      | 1045 |
| 20.348 | 25.57 | Tagetone <dihydro>    | 1051 |
| 21.812 | 0.1   | Pinene oxide <alpha>  | 1072 |
| 25.537 | 2.07  | Ocimene               | 1127 |
| 25.877 | 0.35  | Epoxyocimene          | 1132 |
| 26.731 | 0.49  | Tagetone <E>          | 1144 |
| 27.22  | 11.34 | Tagetone <cis>        | 1151 |
| 32.682 | 2.22  | Ocimenone <Z>         | 1230 |
| 33.211 | 3.04  | Tagetenone <trans>    | 1237 |
| 45.307 | 1.08  | Caryophyllene <trans> | 1419 |
| 47.567 | 0.53  | Humulene <alpha>      | 1455 |
| 49.157 | 0.27  | Germacrene D          | 1480 |
| 50.053 | 1.62  | Bicyclogermacrene     | 1494 |

## 76.) Blue Tansy

| RT     | Area % | Component                 | RI   |
|--------|--------|---------------------------|------|
| 11.294 | 0.31   | Thujene <alpha>           | 923  |
| 11.683 | 3.19   | Pinene <alpha>            | 930  |
| 12.556 | 0.81   | Camphene                  | 947  |
| 13.804 | 23.59  | Sabinene                  | 971  |
| 14.084 | 7.43   | Pinene <beta>             | 976  |
| 14.71  | 6.31   | Myrcene                   | 987  |
| 15.735 | 6.04   | Phellandrene <alpha>      | 1003 |
| 16.376 | 0.81   | Terpinene <alpha>         | 1013 |
| 16.854 | 3.59   | Cymene <para>             | 1021 |
| 17.137 | 2.55   | Limonene                  | 1025 |
| 17.239 | 0.39   | Phellandrene <beta>       | 1027 |
| 17.329 | 0.31   | 1,8-cineole               | 1028 |
| 18.967 | 1.3    | Terpinene <gamma>         | 1054 |
| 20.742 | 0.45   | Terpinolene               | 1082 |
| 24.915 | 5.93   | Camphor                   | 1143 |
| 26.614 | 1.51   | Borneol <epi>             | 1168 |
| 27.21  | 0.91   | Terpinen-4-ol             | 1177 |
| 34.674 | 0.3    | Thymol                    | 1287 |
| 43.034 | 1.55   | Caryophyllene <trans>     | 1417 |
| 44.402 | 0.32   | Farnesene <Z,beta>        | 1439 |
| 46.87  | 0.83   | Germacrene D              | 1478 |
| 48.727 | 7.82   | 3,6-Dihydrochamazulene    | 1509 |
| 48.841 | 1.23   | Dihydrochamazulene A      | 1511 |
| 49.52  | 0.61   | Sesquiphellandrene <beta> | 1523 |
| 54.753 | 0.91   | Dihydrochamazulene C      | 1612 |
| 55.502 | 2.18   | Dihydrochamazulene D      | 1626 |
| 56.954 | 1.68   | Dihydrochamazulene E      | 1651 |
| 57.065 | 0.85   | Eudesmol <alpha>          | 1653 |
| 61.156 | 15.56  | Chamazulene               | 1728 |
| 75.282 | 0.73   | Geranyl terpene           | 2009 |

## 77.) Thyme

| RT     | Area % | Component                                       | RI   |
|--------|--------|-------------------------------------------------|------|
| 6.437  | 0.07   | Methyl-alpha-methyl butyrate                    | 783  |
| 12.518 | 0.16   | Thujene <alpha>                                 | 924  |
| 12.943 | 0.24   | Pinene <alpha>                                  | 932  |
| 13.879 | 0.31   | Camphene                                        | 948  |
| 15.169 | 0.09   | Sabinene                                        | 971  |
| 15.503 | 0.41   | Octen-3-ol                                      | 977  |
| 16.109 | 0.34   | Myrcene                                         | 988  |
| 16.554 | 0.13   | 3-octanol                                       | 995  |
| 17.886 | 0.17   | Terpinene <alpha>                               | 1016 |
| 18.372 | 1.69   | Cymene <para>                                   | 1023 |
| 18.679 | 0.18   | Limonene                                        | 1028 |
| 18.893 | 0.19   | 1,8-cineole                                     | 1031 |
| 20.59  | 0.61   | Terpinene <gamma>                               | 1057 |
| 21.401 | 0.75   | Sabinene hydrate <cis>                          | 1069 |
| 22.511 | 0.08   | Linalool oxide <trans>                          | 1085 |
| 23.441 | 80.6   | Linalool                                        | 1099 |
| 26.723 | 0.2    | Camphor                                         | 1146 |
| 28.446 | 0.22   | Borneol                                         | 1171 |
| 29.041 | 0.38   | Terpinen-4-ol                                   | 1180 |
| 30.046 | 0.45   | Terpineol <alpha>                               | 1194 |
| 32.025 | 0.19   | 7-methylene-bicyclo[3.3.1]nonan-3-ol            | 1223 |
| 33.784 | 5.83   | Linalyl acetate                                 | 1248 |
| 36.5   | 2.33   | Thymol                                          | 1288 |
| 37.047 | 0.16   | Carvacrol                                       | 1296 |
| 40.038 | 0.11   | 3-Isopropenyl-2-methylenecyclohexyl acetate <Z> | 1341 |
| 40.314 | 0.19   | Terpinyl acetate <alpha>                        | 1345 |
| 42.374 | 0.68   | Geranyl acetate                                 | 1376 |
| 45.095 | 2.89   | Caryophyllene <E>                               | 1418 |
| 49.836 | 0.09   | Bicyclogermacrene                               | 1494 |
| 55.014 | 0.26   | Caryophyllene oxide                             | 1580 |

## 78.) Damiana

| RT     | Area% | Component                   | RI   |
|--------|-------|-----------------------------|------|
| 8.812  | 0.42  | Isovalerate ethyl           | 846  |
| 12.682 | 5.15  | Pinene <alpha>              | 931  |
| 15.206 | 1.81  | Pinene <beta>               | 976  |
| 18.083 | 1.44  | Cymene <para>               | 1023 |
| 18.613 | 45.67 | 1,8-cineole                 | 1031 |
| 29.666 | 0.79  | Terpineol <alpha>           | 1193 |
| 36.111 | 0.53  | Thymol                      | 1286 |
| 39.919 | 0.91  | Cubebene <alpha>            | 1344 |
| 41.84  | 1.09  | Copaene <alpha>             | 1373 |
| 42.734 | 0.51  | Elemene <beta>              | 1386 |
| 44.661 | 2.62  | Caryophyllene <trans>       | 1416 |
| 46.036 | 1.01  | 6,9-guaiadiene              | 1438 |
| 47.084 | 0.64  | Velerana-7,11-diene         | 1455 |
| 47.199 | 0.92  | Alloaromadendrene           | 1457 |
| 47.837 | 3.99  | Isolongifolenene <dehydro>  | 1467 |
| 48.138 | 0.87  | Cadina-1(6),4-diene <trans> | 1472 |
| 48.643 | 7.84  | Epoxy Drimenene             | 1480 |
| 48.9   | 2.45  | Selinene <delta>            | 1484 |
| 49.019 | 1.14  | Selinene <beta>             | 1486 |
| 49.415 | 1.24  | Cubebol <epi>               | 1492 |
| 49.609 | 1.13  | Muurolene <alpha>           | 1495 |
| 49.834 | 1.93  | Dihydroagarofuran <beta>    | 1499 |
| 50.615 | 0.77  | Cadinene <gamma>            | 1512 |
| 50.796 | 4.15  | Cadinene <delta>            | 1515 |
| 53.343 | 1.7   | Nerolidol <trans>           | 1558 |
| 54.593 | 2.95  | Caryophyllene oxide         | 1579 |
| 55.918 | 0.51  | Ledol                       | 1601 |
| 56.984 | 4.42  | Selina-6-en-4-ol            | 1620 |
| 64.514 | 0.61  | Valencene <13-hydroxy>      | 1756 |

## 79.) Valerian Root

| RT     | Area% | Component                                 | RI   |
|--------|-------|-------------------------------------------|------|
| 12.364 | 0.39  | Tricyclene                                | 922  |
| 12.943 | 7.07  | Pinene <alpha>                            | 932  |
| 13.779 | 1.53  | Fenchene <alpha>                          | 947  |
| 13.896 | 22.52 | Camphene                                  | 949  |
| 15.165 | 0.27  | Sabinene                                  | 971  |
| 15.487 | 4.4   | Pinene <beta>                             | 977  |
| 18.365 | 0.26  | Cymene <para>                             | 1023 |
| 18.673 | 1.63  | Limonene                                  | 1028 |
| 28.442 | 1.18  | Borneol                                   | 1171 |
| 30.086 | 0.27  | Myrtenol                                  | 1195 |
| 32.023 | 0.25  | Thymol <methyl ether>                     | 1223 |
| 36.231 | 41.32 | Bornyl acetate                            | 1284 |
| 38.758 | 3.5   | Myrtenyl acetate                          | 1321 |
| 40.305 | 0.93  | Terpinyl acetate <alpha>                  | 1345 |
| 45.081 | 0.98  | Caryophyllene <E>                         | 1418 |
| 45.77  | 0.27  | Gurjunene <beta>                          | 1429 |
| 47.34  | 0.36  | Humulene <alpha>                          | 1454 |
| 47.463 | 1.54  | Aromadendrene <dehydro>                   | 1456 |
| 49.435 | 0.31  | Dihydroagarofuran <4-epi,cis>             | 1487 |
| 49.827 | 0.92  | Bicyclogermacrene                         | 1494 |
| 51.871 | 0.67  | Kessane                                   | 1528 |
| 53.554 | 0.55  | 3(10)-Caren-4-ol <acetoacetic acid ester> | 1556 |
| 53.728 | 0.32  | Nerolidol <E>                             | 1559 |
| 54.672 | 1     | Spathulenol                               | 1575 |
| 59.366 | 0.21  | Intermedeol                               | 1656 |
| 63.43  | 5.79  | Isobicyclogermacrenal                     | 1729 |
| 66.868 | 0.61  | Bergamotol acetate <Z,alpha,trans>        | 1793 |



## 80.) Vitex

| RT     | Area% | Component                 | RI   |
|--------|-------|---------------------------|------|
| 12.558 | 0.41  | Thujene <alpha>           | 925  |
| 12.989 | 10.83 | Pinene <alpha>            | 933  |
| 15.222 | 12.53 | Sabinene                  | 972  |
| 15.534 | 0.99  | Pinene <beta>             | 977  |
| 16.156 | 1.94  | Myrcene                   | 988  |
| 17.256 | 0.56  | Phellandrene <alpha>      | 1007 |
| 17.928 | 0.75  | Terpinene <alpha>         | 1017 |
| 18.419 | 0.56  | Cymene <para>             | 1024 |
| 18.732 | 3.99  | Limonene                  | 1029 |
| 18.845 | 2.54  | Phellandrene <beta>       | 1030 |
| 18.955 | 16.48 | 1,8-cineole               | 1032 |
| 19.82  | 0.48  | Ocimene <E,beta>          | 1045 |
| 20.637 | 1.23  | Terpinene <gamma>         | 1057 |
| 22.475 | 0.33  | Terpinolene               | 1085 |
| 29.095 | 2.04  | Terpinen-4-ol             | 1180 |
| 30.098 | 0.93  | Terpineol <alpha>         | 1195 |
| 39.432 | 0.31  | Elemene <delta>           | 1332 |
| 40.378 | 7.36  | Terpinyl acetate <alpha>  | 1346 |
| 40.557 | 0.65  | Citronellyl acetate       | 1349 |
| 44.359 | 1.24  | Gurjunene <alpha>         | 1407 |
| 45.157 | 8.67  | Caryophyllene <E>         | 1419 |
| 45.983 | 0.42  | Bergamotene <alpha,trans> | 1432 |
| 46.326 | 0.28  | Aromadendrene             | 1438 |
| 46.457 | 0.54  | Farnesene <Z,beta>        | 1440 |
| 47.227 | 15.53 | Farnesene <E,beta>        | 1452 |
| 47.679 | 1.82  | Alloaromadendrene         | 1459 |
| 48.998 | 0.66  | Germacrene D              | 1480 |
| 49.607 | 0.28  | Viridiflorene             | 1490 |
| 49.897 | 5.28  | Bicyclogermacrene         | 1495 |
| 54.743 | 0.37  | Spathulenol               | 1576 |

## 81.) Plai

| RT     | Area % | Component                              | RI   |
|--------|--------|----------------------------------------|------|
| 12.679 | 1.34   | Thujene <alpha>                        | 925  |
| 13.109 | 1.43   | Pinene <alpha>                         | 933  |
| 15.368 | 21.06  | Sabinene                               | 972  |
| 15.677 | 1.95   | Pinene <beta>                          | 978  |
| 16.298 | 1.1    | Myrcene                                | 989  |
| 17.404 | 0.18   | Phellandrene <alpha>                   | 1007 |
| 18.081 | 2.37   | Terpinene <alpha>                      | 1017 |
| 18.574 | 3.44   | Cymene <para>                          | 1024 |
| 18.88  | 0.48   | Limonene                               | 1029 |
| 18.993 | 1.43   | Phellandrene <beta>                    | 1031 |
| 19.101 | 0.21   | 1,8-cineole                            | 1032 |
| 20.798 | 4.39   | Terpinene <gamma>                      | 1058 |
| 21.614 | 0.35   | 4-Thujanol <cis>                       | 1070 |
| 22.636 | 0.89   | Terpinolene                            | 1085 |
| 23.718 | 0.26   | Sabinene hydrate <trans>               | 1101 |
| 25.346 | 0.71   | Menth-2-en-1-ol <cis,p>                | 1125 |
| 26.589 | 0.56   | Menth-2-en-1-ol <trans,p>              | 1142 |
| 29.312 | 24.81  | Terpinen-4-ol                          | 1181 |
| 30.271 | 0.91   | Terpineol <alpha>                      | 1195 |
| 31.225 | 0.4    | Piperitol <trans>                      | 1209 |
| 40.544 | 1.28   | Terpinyl acetate <alpha>               | 1346 |
| 49.156 | 1.08   | Curcumene <alpha>                      | 1481 |
| 50.024 | 2.2    | Zingiberene <alpha>                    | 1495 |
| 50.818 | 0.81   | Bisabolene <beta>                      | 1508 |
| 51.287 | 0.78   | (3,4-Dimethoxyphenyl)but-1-ene <cis>   | 1515 |
| 51.798 | 12.62  | Sesquiphellandrene <beta>              | 1524 |
| 54.187 | 0.78   | (3',4'-Dimethoxyphenyl)butadiene <Z>   | 1564 |
| 55.685 | 3.69   | (3,4-Dimethoxyphenyl)but-1-ene <trans> | 1589 |
| 57.856 | 8.49   | (3,4-Dimethoxyphenyl)butadiene <trans> | 1627 |

## 82.) Ginger

| RT     | Area% | Component                          | RI   |
|--------|-------|------------------------------------|------|
| 12.944 | 2.23  | Pinene <alpha>                     | 932  |
| 13.885 | 7.33  | Camphene                           | 948  |
| 15.486 | 0.27  | Pinene <beta>                      | 977  |
| 16.108 | 0.89  | Myrcene                            | 988  |
| 17.207 | 0.2   | Phellandrene <alpha>               | 1006 |
| 18.679 | 1.32  | Limonene                           | 1028 |
| 18.793 | 3.84  | Phellandrene <beta>                | 1030 |
| 18.891 | 3.3   | 1,8-cineole                        | 1031 |
| 28.437 | 0.72  | Borneol                            | 1171 |
| 30.035 | 0.37  | Terpineol <alpha>                  | 1194 |
| 32.97  | 2.22  | Neral                              | 1236 |
| 35.002 | 3.85  | Geranial                           | 1266 |
| 42.248 | 0.31  | Copaene <alpha>                    | 1374 |
| 43.133 | 0.61  | Elemene <beta>                     | 1388 |
| 47.15  | 0.5   | Farnesene <E,beta>                 | 1451 |
| 48.919 | 6.92  | Curcumene                          | 1479 |
| 49.822 | 34.29 | Zingiberene <alpha>                | 1494 |
| 50.038 | 2.37  | Amorphene <gamma>                  | 1497 |
| 50.352 | 5.26  | Farnesene <E,E,alpha>              | 1502 |
| 50.578 | 6.33  | Bisabolene <beta>                  | 1506 |
| 50.81  | 0.27  | Cadinene <gamma>                   | 1510 |
| 51.279 | 0.5   | Panasinsen <(-)-alpha>             | 1518 |
| 51.549 | 13.2  | Sesquiphellandrene <beta>          | 1522 |
| 51.709 | 0.35  | Bisabolene <E,gamma>               | 1525 |
| 53.631 | 0.41  | Germacrene B                       | 1557 |
| 53.719 | 0.45  | Nerolidol <E>                      | 1559 |
| 56.849 | 0.53  | Zingiberenol                       | 1612 |
| 57.818 | 0.41  | 7-epi-cis-sesquisabinene hydrate   | 1629 |
| 59.174 | 0.46  | Eudesmol <alpha>                   | 1653 |
| 60.907 | 0.29  | 7-epi-trans-sesquisabinene hydrate | 1683 |

**Supplementary Figure 2.** Structures of Potentially Active Major Constituents. All major constituents with potential antifungal activity are shown. Bin numbers are from the similarity analysis.

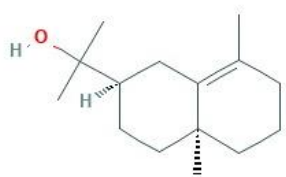

PubChem ID: 6430754  
Name: 10-Epi-Gamma-Eudesmol  
Bin: 1

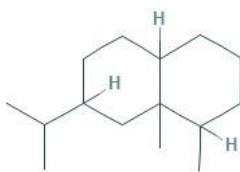

PubChem ID: 27255  
Name: 10-Alpha-Eremophilane  
Bin: 1

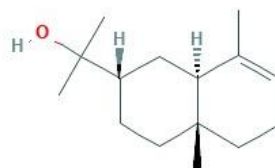

PubChem ID: 12304196  
Name: 7-Epi-Alpha-Eudesmol  
Bin: 1

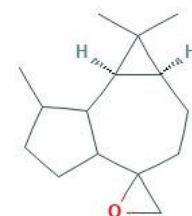

PubChem ID: 91746712  
Name: Allo-Aromadendrene Epoxide  
Bin: 1

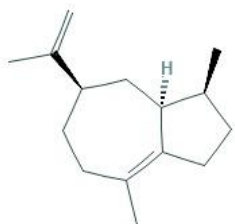

PubChem ID: 94275  
Name: Alpha-Bulnesene  
Bin: 1

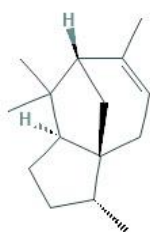

PubChem ID: 6431015  
Name: Alpha-Cedrene  
Bin: 1

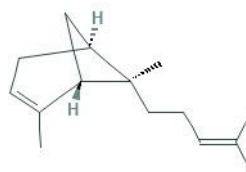

PubChem ID: 6429302  
Name: Trans-Alpha-Bergamotol  
Bin: 1

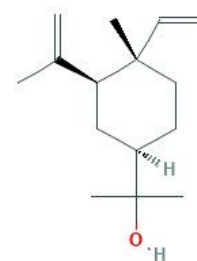

PubChem ID: 92138  
Name: Alpha-Elemol  
Bin: 1

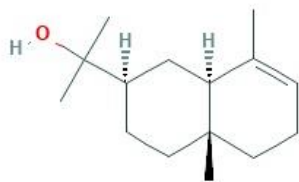

PubChem ID: 92762  
Name: Alpha-Eudesmol  
Bin: 1

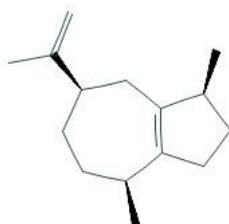

PubChem ID: 5317844  
Name: Alpha-Guaiene  
Bin: 1

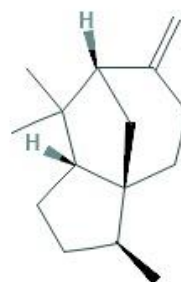

PubChem ID: 60147454  
Name: Beta-Funebrene  
Bin: 1

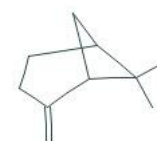

PubChem ID: 14896  
Name: Beta-Pinene  
Bin: 1

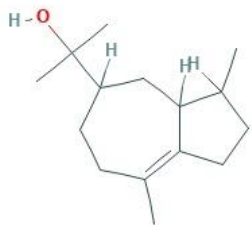

PubChem ID: 90785  
Name: Bulnesol  
Bin: 1

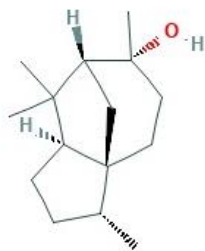

PubChem ID: 65575  
Name: Cedrol  
Bin: 1

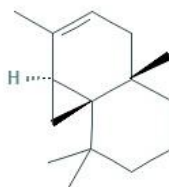

PubChem ID: 442402  
Name: Cis-Thujopsene  
Bin:1

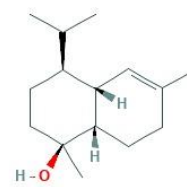

PubChem ID: 3084331  
Name: Epi-Alpha-Murrolol  
Bin: 1

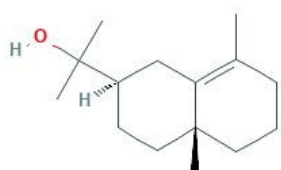

PubChem ID: 6432005  
Name: Gamma-Eudesmol  
Bin: 1

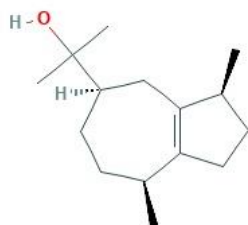

PubChem ID: 227829  
Name: Guaiol  
Bin: 1

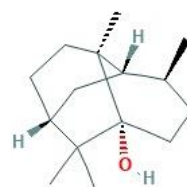

PubChem ID: 10955174  
Name: Patchouli Alcohol  
Bin: 1

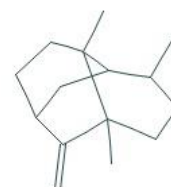

PubChem ID: 519743  
Name: Seychellene  
Bin: 1

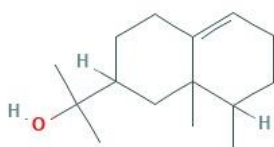

PubChem ID: 146808  
Name: Valerianol  
Bin: 1

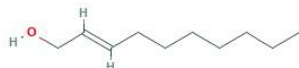

PubChem ID: 5364942  
Name: 2-Trans-Decen-1-ol  
Bin: 3

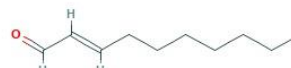

PubChem ID: 5283345  
Name: 2-Trans-Decenal  
Bin: 3

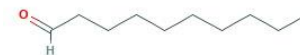

PubChem ID: 8175  
Name: n-Decanal  
Bin: 3

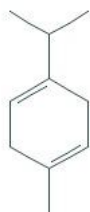

PubChem ID: 7461  
Name: Gamma-Terpinene  
Bin: 25

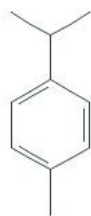

PubChem ID: 7463  
Name: Para-Cymene  
Bin: 25

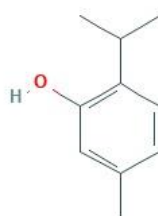

PubChem ID: 6989  
Name: Thymol  
Bin: 25

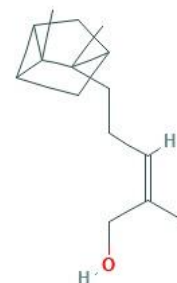

PubChem ID: 5281531  
Name: Cis-Alpha-Santalol  
Bin: 20

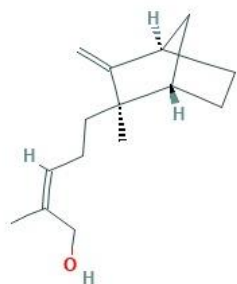

PubChem ID: 6857681  
Name: Cis-Beta-Santalol  
Bin: 20

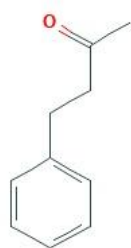

PubChem ID: 17355  
Name: Benzylacetone  
Bin: 13

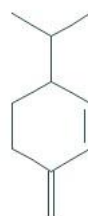

PubChem ID: 11142  
Name: Beta-Phellandrene  
Bin: 15

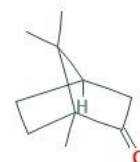

PubChem ID: 2537  
Name: Camphor  
Bin: 18

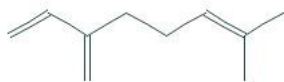

PubChem ID: 31253  
Name: Myrcene  
Bin: 27
